# Supplementary material
Source: HighWire-hosted journal article supplement (https://bmjopen.bmj.com/content/9/1/e022577)

# Comparative safety of the sodium glucose co-transporter 2 (SGLT2) inhibitors: A systematic review and meta-analysis.

## Online Appendix

### Section 1: Search Strategies

Table 1A. Pubmed Search Strategy

|   |                                                                                                                                                                                    | Search String                                                                                                                                                                                                                                                                                                                                                                                                                                                                                                                                                                                                                                                                                                                                                                                                                                                                                                                                                                                                                                                                                                                                                                                                                                                                                                                                                                                                                                                                                                                                                                                                                                                                                                   | Results |
|---|------------------------------------------------------------------------------------------------------------------------------------------------------------------------------------|-----------------------------------------------------------------------------------------------------------------------------------------------------------------------------------------------------------------------------------------------------------------------------------------------------------------------------------------------------------------------------------------------------------------------------------------------------------------------------------------------------------------------------------------------------------------------------------------------------------------------------------------------------------------------------------------------------------------------------------------------------------------------------------------------------------------------------------------------------------------------------------------------------------------------------------------------------------------------------------------------------------------------------------------------------------------------------------------------------------------------------------------------------------------------------------------------------------------------------------------------------------------------------------------------------------------------------------------------------------------------------------------------------------------------------------------------------------------------------------------------------------------------------------------------------------------------------------------------------------------------------------------------------------------------------------------------------------------|---------|
| 1 | <b>Population</b>                                                                                                                                                                  | "Diabetes Mellitus, Type 2"[Mesh] OR NIDDM[tw] OR t2dm[tw] OR (("type 2"[tw] OR "type ii"[tw] OR "adult onset"[tw] OR "mature onset"[tw] OR "late onset"[tw] OR "noninsulin-dependent"[tw] OR "non insulin dependent"[tw]) AND diabetes[tw])                                                                                                                                                                                                                                                                                                                                                                                                                                                                                                                                                                                                                                                                                                                                                                                                                                                                                                                                                                                                                                                                                                                                                                                                                                                                                                                                                                                                                                                                    | 167100  |
| 2 | <b>Intervention:<br/>SGLT2s</b>                                                                                                                                                    | "Sodium-Glucose Transport Proteins/antagonists and inhibitors"[Mesh] OR "Sodium-Glucose Transporter 2"[Mesh] OR "sodium-glucose co-transporter 2"[tw] OR SGL2[tw] OR SGLT2[tw] OR gliflozin*[tw] OR "Canagliflozin"[Mesh] OR canagliflozin*[tw] OR invokana[tw] OR sulisent[tw] OR "TA 7284"[tw] OR TA7284[tw] OR "JNJ 28431754"[tw] OR JNJ28431754[tw] OR "2-(3-(4-ethoxybenzyl)-4-chlorophenyl)-6-hydroxymethyltetrahydro-2H-pyran-3,4,5-triol"[Supplementary Concept] OR dapagliflozin*[tw] OR farxiga[tw] OR forxiga[tw] OR "BMS 512148"[tw] OR BMS512148[tw] OR "empagliflozin"[Supplementary Concept] OR empagliflozin*[tw] OR jardiance[tw] OR "BI 10773"[tw] OR BI10773[tw] OR ipragliflozin[Supplementary Concept] OR ipragliflozin*[tw] OR suglat[tw] OR "ASP 1941"[tw] OR ASP1941[tw] OR "1,5-anhydro-1-(5-(4-ethoxybenzyl)-2-methoxy-4-methylphenyl)-1-thioglutitol"[Supplementary Concept] OR luseogliflozin*[tw] OR lusefi[tw] OR "TS 071"[tw] OR TS071[tw] OR "remogliflozin etabonate"[Supplementary Concept] OR remogliflozin*[tw] OR "KGT 1681"[tw] OR KGT1681[tw] OR "(2S,3R,4R,5S,6R)-2-(4-chloro-3-(4-ethoxybenzyl)phenyl)-6-(methylthio)tetrahydro-2H-pyran-3,4,5-triol" [Supplementary Concept] OR sotagliflozin*[tw] OR "LX 4221"[tw] OR LX4221[tw] OR "6-((4-ethylphenyl)methyl)-3',4',5',6'-tetrahydro-6'-(hydroxymethyl)spiro(isobenzofuran-1(3H),2'-(2H)pyran)-3',4',5'-triole"[Supplementary Concept] OR tofogliflozin*[tw] OR apleway[tw] OR deberza[tw] OR "CSG 452"[tw] OR CSG452[tw] OR "5-(4-chloro-3-(4-ethoxybenzyl)phenyl)-1-hydroxymethyl-6,8-dioxabicyclo(3.2.1)octane-2,3,4-triole"[Supplementary Concept] OR ertugliflozin*[tw] OR "PF 04971729"[tw] OR PF04971729[tw] | 2936    |
| 3 | <b>#1 AND #2</b>                                                                                                                                                                   |                                                                                                                                                                                                                                                                                                                                                                                                                                                                                                                                                                                                                                                                                                                                                                                                                                                                                                                                                                                                                                                                                                                                                                                                                                                                                                                                                                                                                                                                                                                                                                                                                                                                                                                 | 2080    |
| 4 | <b>Study Type<br/>Filter:<br/>Cochrane<br/>Highly<br/>Sensitive<br/>Search<br/>Strategy for<br/>identifying<br/>randomized<br/>trials in<br/>MEDLINE:<br/>sensitivity-<br/>and</b> | ("randomized controlled trial"[pt] OR "controlled clinical trial"[pt] OR randomized[tiab] OR placebo[tiab] OR "clinical trials as topic"[Mesh:NoExp] OR randomly[tiab] OR trial[tij] NOT (animals[mh] NOT humans[mh]))                                                                                                                                                                                                                                                                                                                                                                                                                                                                                                                                                                                                                                                                                                                                                                                                                                                                                                                                                                                                                                                                                                                                                                                                                                                                                                                                                                                                                                                                                          | 1065055 |

|   |                                                                                                                                                                                                                                                                                  |  |     |
|---|----------------------------------------------------------------------------------------------------------------------------------------------------------------------------------------------------------------------------------------------------------------------------------|--|-----|
|   | precision-maximizing version (2008 revision). Available at <a href="http://handbook.cochrane.org/chapter_6/box_6.4_box_cochrane_hss_2008_sensprec_publications_bmed.htm">http://handbook.cochrane.org/chapter_6/box_6.4_box_cochrane_hss_2008_sensprec_publications_bmed.htm</a> |  |     |
| 5 | #3 AND #4                                                                                                                                                                                                                                                                        |  | 743 |

Table 2A: Cochrane Library Search Strategy

|    |                                                                                                                                                                                                                                                                                                                                                                                                                                                                                                                                                                                                                                                                                                                         |        |
|----|-------------------------------------------------------------------------------------------------------------------------------------------------------------------------------------------------------------------------------------------------------------------------------------------------------------------------------------------------------------------------------------------------------------------------------------------------------------------------------------------------------------------------------------------------------------------------------------------------------------------------------------------------------------------------------------------------------------------------|--------|
| #1 | ([mh "Diabetes Mellitus, Type 2"] or NIDDM or t2dm or ("type 2" or "type ii" or "adult onset" or "mature onset" or "late onset" or "noninsulin-dependent" or "non insulin dependent") and (diabetes))                                                                                                                                                                                                                                                                                                                                                                                                                                                                                                                   | 25,454 |
| #2 | ([mh "Sodium-Glucose Transport Proteins"/ai] or [mh "Sodium-Glucose Transporter 2"] or "sodium-glucose co-transporter 2" or SGL2 or SGLT2 or gliflozin* or [mh canagliflozin] or canagliflozin* or invokana or sulisent or "TA 7284" or TA7284 or "JNJ 28431754" or JNJ28431754 or dapagliflozin* or farxiga or forxiga or "BMS 512148" or BMS512148 or empagliflozin* or jardiance or "BI 10773" or BI10773 or ipragliflozin or suglat or "ASP 1941" or ASP1941 or luseogliflozin* or lusefi or "TS 071" or TS071 or remogliflozin* or "KGT 1681" or KGT1681 or sotagliflozin* or "LX 4221" or LX4221 or tofogliflozin* or apleway or deberza or "CSG 452" or CSG452 or ertugliflozin* or "PF 04971729" or PF04971729) | 1,082  |
| #3 | #1 AND #2                                                                                                                                                                                                                                                                                                                                                                                                                                                                                                                                                                                                                                                                                                               | 959    |

Table 3A: Embase Search Strategy

| No.                                                                                | Query                                                                                                                                                                                                                                                                                                                                                                                                                                                                                                                                                                                                                                                                                                                                                                                                                                                                                                                                                           | Results   |
|------------------------------------------------------------------------------------|-----------------------------------------------------------------------------------------------------------------------------------------------------------------------------------------------------------------------------------------------------------------------------------------------------------------------------------------------------------------------------------------------------------------------------------------------------------------------------------------------------------------------------------------------------------------------------------------------------------------------------------------------------------------------------------------------------------------------------------------------------------------------------------------------------------------------------------------------------------------------------------------------------------------------------------------------------------------|-----------|
| #5                                                                                 | #3 AND #4                                                                                                                                                                                                                                                                                                                                                                                                                                                                                                                                                                                                                                                                                                                                                                                                                                                                                                                                                       | 2,016     |
| #4 - EMBASE RCT filter from Wong 2006, best balance of sensitivity and specificity | random*:ab,ti OR placebo*:de,ab,ti OR (double NEXT/1 blind*):ab,ti                                                                                                                                                                                                                                                                                                                                                                                                                                                                                                                                                                                                                                                                                                                                                                                                                                                                                              | 1,533,336 |
| #3                                                                                 | #1 AND #2                                                                                                                                                                                                                                                                                                                                                                                                                                                                                                                                                                                                                                                                                                                                                                                                                                                                                                                                                       | 4,869     |
| #2                                                                                 | 'sodium glucose cotransporter 2'/de OR 'sodium glucose cotransporter 2 inhibitor'/exp OR 'sodium-glucose co-transporter 2':ab,ti OR sgl2:ab,ti OR sglT2:ab,ti OR gliflozin*:ab,ti OR canagliflozin*:ab,ti OR invokana:ab,ti OR sulisent:ab,ti OR 'ta 7284':ab,ti OR ta7284:ab,ti OR 'jnj 28431754':ab,ti OR jnj28431754:ab,ti OR dapagliflozin*:ab,ti OR farxiga:ab,ti OR forxiga:ab,ti OR 'bms 512148':ab,ti OR bms512148:ab,ti OR empagliflozin*:ab,ti OR jardiance:ab,ti OR 'bi 10773':ab,ti OR bi10773:ab,ti OR ipragliflozin*:ab,ti OR suglat:ab,ti OR 'asp 1941':ab,ti OR asp1941:ab,ti OR luseogliflozin*:ab,ti OR lusefi:ab,ti OR 'ts 071':ab,ti OR ts071:ab,ti OR remogliflozin*:ab,ti OR 'kgt 1681':ab,ti OR kgt1681:ab,ti OR sotagliflozin*:ab,ti or 'LX 4221':ab,ti or LX4221:ab,ti or tofogliflozin*:ab,ti or apleway:ab,ti or deberza:ab,ti or 'CSG 452':ab,ti or CSG452:ab,ti or ertugliflozin*:ab,ti or 'PF 04971729':ab,ti or PF04971729:ab,ti | 6,675     |
| #1                                                                                 | 'non insulin dependent diabetes mellitus'/de OR niddm:ab,ti OR t2dm:ab,ti OR ('type 2':ab,ti OR 'type ii':ab,ti OR 'adult onset':ab,ti OR 'mature onset':ab,ti OR 'late onset':ab,ti OR 'noninsulin dependent':ab,ti OR 'non insulin dependent':ab,ti AND diabetes:ab,ti)                                                                                                                                                                                                                                                                                                                                                                                                                                                                                                                                                                                                                                                                                       | 258,521   |

Table 4A: IPA Search Strategy

| #  | Query                                                                                                                                                                                                                                                                                                                                                                                                                                                                                                                                                                                                     | Limiters/Expanders            | Results |
|----|-----------------------------------------------------------------------------------------------------------------------------------------------------------------------------------------------------------------------------------------------------------------------------------------------------------------------------------------------------------------------------------------------------------------------------------------------------------------------------------------------------------------------------------------------------------------------------------------------------------|-------------------------------|---------|
| S1 | TX NIDDM OR t2dm OR (("type 2" OR "type ii" OR "adult onset" OR "mature onset" OR "late onset" OR "noninsulin dependent" OR "non insulin dependent") AND (diabetes))                                                                                                                                                                                                                                                                                                                                                                                                                                      | Search modes - Boolean/Phrase | 6,110   |
| S2 | TX "sodium-glucose co-transporter 2" OR sgl2 OR sgl2 OR gliflozin OR canagliflozin OR invokana OR sulisent OR "ta 7284" OR ta7284 OR "jnj 28431754" OR jnj28431754 OR dapagliflozin* OR farxiga OR forxiga OR "bms 512148" OR bms512148 OR empagliflozin* OR jardiance OR "bi 10773" OR bi10773 OR ipragliflozin* OR suglat OR "asp 1941" OR asp1941 OR luseogliflozin* OR lusefi OR "ts 071" OR ts071 OR remogliflozin* OR "kgt 1681" OR kgt1681 OR sotagliflozin* OR "LX 4221" OR LX4221 OR tofogliflozin* OR apleway OR deberza OR "CSG452" OR CSG452 OR ertugliflozin* OR "PF 04971729" OR PF04971729 | Search modes - Boolean/Phrase | 337     |
| S3 | S1 AND S2                                                                                                                                                                                                                                                                                                                                                                                                                                                                                                                                                                                                 | Search modes - Boolean/Phrase | 267     |
| S4 | TI randomized OR AB randomized OR TI randomised OR AB randomised OR TI placebo OR AB placebo OR TI randomly OR AB randomly OR TI trial                                                                                                                                                                                                                                                                                                                                                                                                                                                                    | Search modes - Boolean/Phrase | 59,232  |
| S5 | S3 AND S4                                                                                                                                                                                                                                                                                                                                                                                                                                                                                                                                                                                                 | Search modes - Boolean/Phrase | 130     |

Table 5A: ProQuest Search Strategy

|                                                                                                                                                                                                                                                                                                                                                                                                                                                                                                                                                                                                                                                                                                                                                                  |   |
|------------------------------------------------------------------------------------------------------------------------------------------------------------------------------------------------------------------------------------------------------------------------------------------------------------------------------------------------------------------------------------------------------------------------------------------------------------------------------------------------------------------------------------------------------------------------------------------------------------------------------------------------------------------------------------------------------------------------------------------------------------------|---|
| all(NIDDM OR t2dm OR (("type 2" OR "type ii" OR "adult onset" OR "mature onset" OR "late onset" OR "noninsulin-dependent" OR "non insulin dependent") AND (diabetes))) AND all("sodium-glucose co-transporter 2" OR SGL2 OR SGLT2 OR gliflozin* OR canagliflozin* OR invokana OR sulisent OR "TA 7284" OR TA7284 OR "JNJ 28431754" OR JNJ28431754 OR dapagliflozin* OR farxiga OR forxiga OR "BMS 512148" OR BMS512148 OR empagliflozin* OR jardiance OR "BI 10773" OR BI10773 OR ipragliflozin OR suglat OR "ASP 1941" OR ASP1941 OR luseogliflozin* OR lusefi OR "TS 071" OR TS071 OR remogliflozin* OR "KGT 1681" OR KGT1681 OR sotagliflozin* OR "LX 4221" OR LX4221 OR tofogliflozin* OR apleway OR deberza OR "CSG 452" OR CSG452 OR ertugliflozin* OR "PF | 3 |
|------------------------------------------------------------------------------------------------------------------------------------------------------------------------------------------------------------------------------------------------------------------------------------------------------------------------------------------------------------------------------------------------------------------------------------------------------------------------------------------------------------------------------------------------------------------------------------------------------------------------------------------------------------------------------------------------------------------------------------------------------------------|---|

04971729" OR PF04971729)

## Section 2: List of Extracted Variables

Table 6A. List of Extracted Variables

| Variable Extraction                       | Notes                                                                |
|-------------------------------------------|----------------------------------------------------------------------|
| NCT Number, Author and Year               |                                                                      |
| Country in which the study was conducted  | International if applicable                                          |
| Start and End years                       |                                                                      |
| Observation Period (# of weeks)           |                                                                      |
| Total number of participants randomized   |                                                                      |
| Number of Males                           |                                                                      |
| Number of Females                         |                                                                      |
| Background diabetes therapy               |                                                                      |
| Intervention 1: SGLT2 Agent               | This was captured for as many interventions that were used.          |
| Intervention 1: Dose                      |                                                                      |
| Intervention 1: Number of Persons         |                                                                      |
| Intervention 1: Mean Age                  |                                                                      |
| Intervention 1: Age SD                    |                                                                      |
| Intervention 1: Mean baseline HbA1C       |                                                                      |
| Intervention 1: A1C SD                    |                                                                      |
| Comparison 1: SGLT2 Agent                 | This was captured for as many comparison groups that were used.      |
| Comparison 1: Dose                        |                                                                      |
| Comparison 1: Number of Persons           |                                                                      |
| Comparison 1: Mean Age                    |                                                                      |
| Comparison 1: Age SD                      |                                                                      |
| Comparison 1: Mean baseline HbA1C         |                                                                      |
| Comparison 1: A1C SD                      |                                                                      |
| Acute Kidney Injury Reported (yes/no)     |                                                                      |
| Urinary Tract Infection Reported (yes/no) |                                                                      |
| Definition of UTI                         |                                                                      |
| Ketoacidosis Reported (yes/no)            |                                                                      |
| Bone Fracture Reported (yes/no)           |                                                                      |
| Amputation Reported (yes/no)              |                                                                      |
| AKI: Outcomes in Intervention 1(n/N)      | This was captured for each individual intervention and control group |
| AKI: Outcomes in Comparison 1 (n/N)       |                                                                      |
| UTI: Outcomes in Intervention 1(n/N)      |                                                                      |
| UTI: Outcomes in Comparison 1 (n/N)       |                                                                      |

|                                      |  |
|--------------------------------------|--|
| DKA: Outcomes in Intervention 1(n/N) |  |
| DKA: Outcomes in Comparison 1 (n/N)  |  |
| BF: Outcomes in Intervention 1(n/N)  |  |
| BF: Outcomes in Comparison 1 (n/N)   |  |
| Amp: Outcomes in Intervention 1(n/N) |  |
| Amp: Outcomes in Comparison 1 (n/N)  |  |

### Section 3: Study Characteristics

Table 7A: Included Study Characteristics

| NCT#<br>Author and Year       | Country          | Study Duration (weeks) | Total Randomized | Background Therapies                  | Intervention(s)                         | Comparator(s)                 | Outcomes Reported |
|-------------------------------|------------------|------------------------|------------------|---------------------------------------|-----------------------------------------|-------------------------------|-------------------|
| NCT01059825<br>Amin, 2015     | International    | 12                     | 328              | Prior therapy stabilized to metformin | Ertugliflozin<br>1mg, 5 mg, 10mg , 25mg | Placebo, Sitagliptin<br>100mg | UTI               |
| NCT01059825<br>Amin, 2015     | International    | 4                      | 194              | Uncontrolled on 2 agents              | Ertugliflozin<br>1mg, 5mg, 25mg         | Placebo                       | UTI               |
| NCT02157298<br>Araki, 2016    | Japan            | 16                     | 182              | Prior insulin therapy DPP4 allowed    | Dapagliflozin<br>5 mg                   | Placebo                       | UTI, BF           |
| NCT01368081<br>Araki          | Japan            | 52                     | 1160             | Prior SU                              | Empagliflozin<br>10mg, 25mg             | Metformin 50-<br>2250mg/day   | UTI, BF           |
| NCT00528879<br>Bailey, 2013   | International    | 102                    | 546              | Prior metformin                       | Dapagliflozin<br>2.5mg, 5mg, 10mg       | Placebo                       | UTI, AKI, BF      |
| None<br>Bailey, 2012          | International    | 24                     | 282              | Treatment Naive                       | Dapagliflozin<br>1mg, 2.5mg, 5mg        | Placebo                       | UTI, AKI, BF      |
| NCT01164501<br>Barnett, 2014  | International    | 52                     | 741              | Any prior therapies                   | Empagliflozin<br>10mg, 25mg             | Placebo                       | UTI, DKA, BF      |
| NCT01106651<br>Bode, 2015     | International    | 104                    | 716              | Prior Naive mono or combo therapy     | Canagliflozin<br>100mg, 300mg           | Placebo                       | UTI, DKA, BF      |
| NCT00855166<br>Bolinder, 2014 | European         | 102                    | 182              | Prior metformin                       | Dapagliflozin<br>10mg                   | Placebo                       | UTI, BF           |
| NCT01031680<br>Cefalu, 2015   | International    | 52                     | 922              | Any prior therapies                   | Dapagliflozin<br>10mg                   | Placebo                       | UTI, AKI, BF      |
| NCT01505426<br>Lu, 2016       | Korea and Taiwan | 24                     | 171              | Prior metformin                       | Ipragliflozin<br>50mg                   | Placebo                       | UTI, BF           |
| NCT01422876<br>DeFronzo, 2015 | International    | 52                     | 686              | Prior metformin                       | Empagliflozin<br>10mg, 25mg             | Linagliptin 5mg               | UTI               |
| NCT00660907<br>Prato, 2015    | International    | 208                    | 816              | Prior metformin                       | Dapagliflozin (mixed dose)              | Glipizide (mixed doses)       | UTI, BF           |

|                                 |                                                 |        |      |                                      |                                                  |                             |               |
|---------------------------------|-------------------------------------------------|--------|------|--------------------------------------|--------------------------------------------------|-----------------------------|---------------|
| NCT00881530<br>Ferrannini, 2013 | International                                   | 78     | 271  | Treatment Naive                      | Empagliflozin<br>10mg, 25mg                      | Metformin 2000mg<br>max     | UTI, BF       |
| NCT00881530<br>Ferrannini, 2013 | International                                   | 78     | 388  | Prior metformin                      | Empagliflozin<br>10mg, 25mg                      | Sitagliptin 100mg           | UTI, BF       |
| NCT00528372<br>Ferrannini, 2010 | International                                   | 24     | 485  | Treatment Naive                      | Dapagliflozin<br>2.5mg, 5mg, 10mg                | Placebo                     | UTI           |
| NCT01071850<br>Fonseca, 2013    | India, Philippines,<br>Columbia, Mexico,<br>USA | 12-    | 412  | Treatment Naive                      | Ipragliflozin<br>12.5mg, 50mg, 150mg,<br>300mg   | Placebo, Metormin<br>1500mg | UTI           |
| NCT02229396<br>Frias, 2016      | International                                   | 28     | 695  | Prior metformin                      | Dapagliflozin<br>10mg                            | Exenatide 2mg               | UTI, AKI, DKA |
| NCT01719003<br>Hadjadj, 2016    | International                                   | 24     | 1364 | Treatment Naive                      | Empagliflozin<br>10mg, 25mg                      | Metformin 1000mg,<br>2000mg | UTI, DKA, BF  |
| NCT01289990<br>Haering, 2015    | International                                   | 76     | 666  | Prior Metformin<br>and SU            | Empagliflozin<br>10mg, 25mg                      | Placebo                     | UTI           |
| None<br>Heise, 2013             | Germany                                         | 4      | 78   | Not described                        | Empagliflozin<br>10mg, 25mg, 100mg               | Placebo                     | UTI           |
| None<br>Heise, 2013             | Germany                                         | 9 days | 48   | Prior Naive mono<br>or combo therapy | Empagliflozin<br>2.5mg, 10mg, 25mg,<br>100mg     | Placebo                     | UTI           |
| NCT00643851<br>Henry, 2012      | International                                   | 24     | 603  | Treatment Naive                      | Dapagliflozin<br>5mg                             | Placebo                     | UTI, BF       |
| NCT00643851<br>Henry, 2012      | International                                   | 24     | 603  | Treatment Naive                      | Dapagliflozin<br>5mg                             | Metformin (mixed<br>doses)  | UTI, BF       |
| NCT00859898<br>Henry, 2012      | International                                   | 24     | 641  | Treatment Naive                      | Dapagliflozin<br>10mg                            | Placebo                     | UTI, BF       |
| NCT00859898<br>Henry, 2012      | International                                   | 24     | 641  | Treatment Naive                      | Dapagliflozin<br>10mg                            | Metformin (mixed<br>doses)  | UTI, BF       |
| NCT00800176<br>Ikeda; 2015      | International                                   | 12     | 398  | Naive or<br>metformin                | Tofogliflozin<br>2.5mg, 5mg, 10mg,<br>20mg, 40mg | Placebo                     | UTI, DKA      |
| NCT02220920<br>Inagaki, 2016    | Japan                                           | 16     | 146  | Prior insulin<br>therapy             | Canagliflozin<br>100mg                           | Placebo                     | UTI, DKA, BF  |
| NCT01387737<br>Inagaki, 2015    | Japan                                           | 52     | 1299 | Any prior<br>therapies<br>washed-out | Canagliflozin<br>100mg, 200mg                    | No comparator               | UTI, DKA, BF  |



|                                |               |    |     |                                              |                                         |               |         |
|--------------------------------|---------------|----|-----|----------------------------------------------|-----------------------------------------|---------------|---------|
| NCT01022112<br>Inagaki, 2013   | Japan         | 12 | 383 | Any prior therapies washed-out               | Canagliflozin 50mg, 100mg, 200mg, 300mg | Placebo       | UTI, BF |
| NCT01413204<br>Inagaki, 2014   | Japan         | 24 | 272 | Any prior therapies washed-out               | Canagliflozin 100mg, 200mg              | Placebo       | UTI, BF |
| NCT02175784<br>Ishihara, 2016  | Japan         | 16 | 262 | Prior insulin others allowed                 | Ipragliflozin 50mg                      | Placebo       | UTI     |
| NCT00984867<br>Jabbour, 2013   | International | 48 | 451 | Prior DPP4 maybe metformin no others         | Dapagliflozin 10mg                      | Placebo       | UTI, BF |
| NCT01381900<br>Ji, 2015        | International | 18 | 678 | Prior Metformin and maybe SU                 | Canagliflozin 100mg, 300mg              | Placebo       | UTI, BF |
| NCT01095653<br>Ji, 2014        | Asia          | 24 | 393 | Treatment Naive                              | Dapagliflozin 5mg, 10mg                 | Placebo       | UTI, BF |
| NCT01023945<br>Kadokura, 2014  | Japan         | 2  | 30  | Treatment Naive or monotherapy               | Ipragliflozin 50mg, 100mg               | Placebo       | UTI     |
| NCT01193218<br>Kadowaki, 2015  | Japan         | 52 | 547 | Treatment Naive or monotherapy               | Empagliflozin 10mg, 25mg                | No comparator | UTI, BF |
| NCT00972244<br>Kaku, 2013      | Japan         | 12 | 279 | Treatment Naive or 1 or 2 agents at low dose | Dapagliflozin 1mg, 2.5mg, 5mg, 10mg     | Placebo       | UTI, BF |
| None<br>Kaku, 2014             | Japan         | 24 | 261 | Treatment Naive or monotherapy               | Dapagliflozin 5mg, 10mg                 | Placebo       | UTI, BF |
| None<br>Kaku, 2014             | Japan         | 24 | 235 | Treatment Naive or washout                   | Tofogliflozin 10mg, 20mg, 40mg          | Placebo       | UTI, BF |
| NCT01242215<br>Kashiwagi, 2015 | Japan         | 52 | 245 | Prior SU                                     | Ipragliflozin 50mg                      | Placebo       | UTI     |
| NCT01057628<br>Kashiwagi, 2015 | Japan         | 26 | 131 | Treatment Naive or 1 or 2 agents at low dose | Ipragliflozin 50mg                      | Placebo       | UTI     |
| NCT00621868<br>Kashiwagi, 2014 | Japan         | 12 | 361 | Treatment Naive or washout                   | Ipragliflozin 12.5mg, 25mg, 50mg, 100mg | Placebo       | UTI     |
| NCT01316094<br>Kashiwagi, 2015 | Japan         | 52 | 165 | Treatment Naive or 1 or 2 agents at low dose | Ipragliflozin 50mg                      | Placebo       | UTI     |

|                                          |               |     |      |                                                   |                                                      |                                  |              |
|------------------------------------------|---------------|-----|------|---------------------------------------------------|------------------------------------------------------|----------------------------------|--------------|
| NCT00663260<br>Kohan, 2014               | International | 104 | 252  | Not described                                     | Dapagliflozin<br>5mg, 10mg                           | Placebo                          | UTI, AKI, BF |
| NCT01210001<br>Kovacs, 2015              | International | 76  | 499  | Prior pioglitazone<br>and maybe<br>metformin      | Empagliflozin<br>10mg, 25mg                          | Placebo                          | UTI, BF      |
| NCT00976495<br>Heerspink, 2013           | International | 12  | 75   | Prior Metformin<br>and maybe SU                   | Dapagliflozin<br>10mg                                | Placebo                          | UTI          |
| NCT01106677<br>Lavalle-Gonzalez,<br>2013 | International | 52  | 1284 | Prior Metformin<br>and maybe SU<br>but washed-out | Canagliflozin<br>100mg, 300mg                        | Sitagliptin 100mg                | UTI, DKA, BF |
| NCT01042977<br>Leiter, 2014              | International | 52  | 964  | Any prior<br>therapies                            | Dapagliflozin<br>10mg                                | Placebo                          | UTI, AKI, BF |
| NCT00968812<br>Leiter, 2015              | International | 104 | 1450 | Prior metformin                                   | Canagliflozin<br>100mg, 300mg                        | Glimepiride 8mg                  | UTI, BF      |
| NCT01422876<br>Lewin, 2015               | International | 52  | 677  | Treatment Naive                                   | Empagliflozin<br>10mg, 25mg                          | Linagliptin 5mg                  | UTI          |
| NCT00263276<br>List, 2008                | International | 12  | 389  | Treatment Naive                                   | Dapagliflozin<br>2.5mg, 5mg, 10mg,<br>20mg, 50mg     | Placebo, Metformin<br>1500mg max | UTI          |
| NCT01646320<br>Mathieu, 2015             | International | 52  | 320  | Prior metformin<br>and DPP4                       | Dapagliflozin<br>10mg                                | Placebo                          | UTI, BF      |
| NCT01392677<br>Matthaei, 2015            | International | 52  | 219  | Prior Metformin<br>and SU                         | Dapagliflozin<br>10mg                                | Placebo                          | UTI          |
| None<br>Mudaliar, 2013                   | International | 12  | 44   | Prior Metformin<br>and maybe SU                   | Dapagliflozin<br>5mg                                 | Placebo                          | UTI          |
| NCT01947855<br>Nishimura, 2015           | Japan         | 4   | 60   | Treatment or<br>monotherapy                       | Empagliflozin<br>10mg, 25mg                          | Placebo                          | UTI, DKA     |
| NCT01340664<br>Qiu, 2014                 | International | 18  | 279  | Prior metformin                                   | Canagliflozin<br>100mg, 300mg                        | Placebo                          | UTI          |
| NCT01989754<br>Rodbard, 2016             | International | 26  | 218  | Prior metformin<br>and DPP4                       | Canagliflozin<br>300mg                               | Placebo                          | UTI, DKA, BF |
| NCT01289990<br>Roden, 2015               | International | 76  | 899  | Treatment Naive                                   | Empagliflozin<br>10mg, 25mg                          | Placebo, Sitagliptin<br>100mg    | UTI, DKA     |
| NCT00642278<br>Rosenstock, 2012          | International | 12  | 451  | Prior metformin                                   | Canagliflozin<br>50mg, 100mg, 200mg,<br>300mg, 600mg | Placebo, Sitagliptin<br>100mg    | UTI          |
| NCT01376557                              | United States | 12  | 299  | Prior metformin                                   | Sotagliflozin                                        | placebo                          | UTI, BF      |

|                                        |               |        |      |                                                     |                                                         |                               |              |
|----------------------------------------|---------------|--------|------|-----------------------------------------------------|---------------------------------------------------------|-------------------------------|--------------|
| Rosenstock, 2015                       |               |        |      |                                                     | 75 mg, 200mg, 400mg                                     |                               |              |
| NCT01809327<br>Rosenstock, 2016        | International | 26     | 1186 | Treatment Naive                                     | Canagliflozin<br>100mg, 300mg                           | Metformin 500mg               | UTI, DKA     |
| NCT01606007<br>Rosenstock, 2015        | International | 24     | 534  | Prior metformin                                     | Dapagliflozin<br>10mg                                   | Placebo                       | UTI, BF      |
| NCT01306214<br>Rosenstock, 2014        | International | 52     | 563  | Prior insulin<br>therapy                            | Empagliflozin<br>10mg, 25mg                             | Placebo                       | UTI, DKA, BF |
| NCT01011868<br>Rosenstock, 2015        | International | 78     | 494  | Prior insulin<br>maybe metformin<br>and SU          | Empagliflozin<br>10mg, 25mg                             | Placebo                       | UTI, DKA     |
| NCT00683878<br>Rosenstock, 2012        | International | 48     | 420  | Treatment Naive<br>or stabilized on<br>pioglitazine | Dapagliflozin<br>5mg, 10mg                              | Placebo                       | UTI, BF      |
| None<br>Ross, 2015                     | International | 16     | 983  | Prior metformin                                     | Empagliflozin<br>10mg, 25mg                             | Placebo                       | UTI          |
| None<br>Sasaki, 2015                   | Japan         | 7 days | 40   | Treatment Naive                                     | Luseogliflozin<br>0.5mg, 1mg, 2.5mg, 5mg                | Placebo                       | UTI          |
| NCT01137812<br>Schernthaler, 2013      | International | 52     | 756  | Prior Metformin<br>and SU                           | Canagliflozin<br>300mg                                  | Sitagliptin 100mg             | UTI, BF      |
| NCT01217892<br>Schumm-Draeger,<br>2014 | International | 16     | 400  | Prior metformin                                     | Dapagliflozin<br>5mg, 10mg, 20mg                        | Placebo                       | UTI, BF      |
| None<br>Seino, 2014                    | Japan         | 12     | 239  | Treatment Naive                                     | Luseogliflozin<br>0.5mg, 2.5mg, 5mg                     | Placebo                       | UTI          |
| None<br>Seino, 2014                    | Japan         | 12     | 282  | Treatment Naive                                     | Luseogliflozin<br>1mg, 2.5mg, 5mg, 10mg                 | Placebo                       | UTI, DKA     |
| None<br>Seino, 2014                    | Japan         | 24     | 158  | Treatment Naive                                     | Luseogliflozin<br>2.5mg                                 | Placebo                       | UTI          |
| NCT01081834<br>Stenlof, 2013           | International | 26     | 587  | Treatment Naive<br>or washout                       | Canagliflozin<br>100mg, 300mg                           | Placebo                       | UTI, BF      |
| NCT00680745<br>Strojek, 2014           | International | 48     | 597  | Prior SU                                            | Dapagliflozin<br>2.5mg, 5mg, 10mg                       | Placebo                       | UTI, BF      |
| NCT00500331<br>Sykes, 2015             | international | 12     | 336  | Treatment Naive                                     | Remogliflozin<br>100mg, 200mg, 500mg,<br>1000mg, 2000mg | Placebo, Pioglitazone<br>30mg | UTI          |
| NCT01370005<br>Tikkanen, 2015          | International | 12     | 825  | Treatment Naive                                     | Empagliflozin<br>10mg, 25mg                             | Placebo                       | UTI, DKA, BF |

|                                               |               |        |      |                                 |                                                |                                    |                      |
|-----------------------------------------------|---------------|--------|------|---------------------------------|------------------------------------------------|------------------------------------|----------------------|
| None<br>Townsend, 2016                        | United States | 6      | 171  | Uncontrolled on<br>1-3 agents   | Canagliflozin<br>100mg, 300mg                  | Placebo                            | UTI                  |
| None<br>Semán, 2016                           | Malaysia      | 12     | 110  | Prior Metformin<br>and SU       | Dapagliflozin<br>10mg                          | Sulphonylureas<br>(various agents) | UTI                  |
| NCT01137474<br>Weber, 2016                    | International | 12     | 944  | Any prior<br>therapies          | Dapagliflozin<br>10mg                          | Placebo                            | UTI, BF              |
| NCT01195662<br>Weber, 2016                    | International | 12     | 449  | Any prior<br>therapies          | Dapagliflozin<br>10mg                          | Placebo                            | UTI, BF              |
| NCT01106625<br>Wilding; 2013                  | International | 52     | 469  | Prior Metformin<br>and SU       | Canagliflozin<br>100mg, 300mg                  | Placebo                            | UTI, DKA, BF         |
| NCT01117584<br>Wilding, 2013                  | International | 12     | 343  | Prior metformin                 | Ipragliflozin<br>12.5mg, 50mg, 150mg,<br>300mg | Placebo                            | UTI                  |
| NCT00357370<br>Wilding, 2009                  | International | 12     | 71   | Any prior<br>therapies          | Dapagliflozin<br>10mg, 20mg                    | Placebo                            | UTI                  |
| NCT00673231<br>Wilding, 2014                  | international | 104    | 808  | Prior insulin<br>others allowed | Dapagliflozin<br>2.5mg, 5/10mg, 10mg           | Placebo                            | UTI, BF              |
| NCT01064414<br>Yale, 2014                     | International | 52     | 269  | Treatment Naive<br>or 1 or 2    | Canagliflozin<br>100mg, 300mg                  | Placebo                            | UTI, BF              |
| NCT01316341<br>Zhao, 2015                     | China         | 9 days | 24   | Treatment Naive<br>or 1 or 2    | Empagliflozin<br>10mg, 25mg                    | Placebo                            | UTI                  |
| NCT01131676<br>Zinman, 2015                   | International | 206    | 7028 | Treatment Naive                 | Empagliflozin<br>10mg, 25mg                    | Placebo                            | UTI, AKI, DKA,<br>BF |
| None<br>Goto, 2012                            |               | 24     | 168  | Prior metformin                 | Ipragliflozin<br>50mg                          | Placebo                            | UTI                  |
| NCT02036515<br>Dagogo-Jack, 2017              | International | 26     | 463  | Prior metformin<br>and DPP4     | Ertugliflozin<br>5mg, 15mg                     | Placebo                            | UTI, DKA, BF         |
| NCT01734785<br>Maldonado-<br>Lutomirsky, 2016 | International | 24     | 606  | Prior metformin<br>and DPP4     | Empagliflozin<br>10mg, 25mg                    | Placebo                            | UTI, AKI, BF         |
| NCT01289990<br>Merker, 2015                   | International | 52     | 637  | Prior metformin                 | Empagliflozin<br>10mg, 25mg                    | Placebo                            | UTI                  |
| NCT01032629<br>Neal, 2015                     | International | 52     | 2074 | Prior insulin<br>therapy        | Canagliflozin<br>100mg, 300mg                  | Placebo                            | UTI, BF              |
| NCT01167881<br>Ridderstrale, 2014             | International | 104    | 1549 | Prior metformin                 | Empagliflozin<br>25mg                          | Glimepiride 1-4mg                  | UTI, AKI, BF         |
| NCT00495469                                   | UK            | 12     | 252  | Treatment Naive                 | Remogliflozin                                  | Placebo, Pioglitazone              | UTI, BF              |

|                                  |               |    |      |                                                                      |                                               |                               |                      |
|----------------------------------|---------------|----|------|----------------------------------------------------------------------|-----------------------------------------------|-------------------------------|----------------------|
| Sykes, 2014                      |               |    |      |                                                                      | 100mg, 250mg, 500mg, 1000mg                   | 30mg                          |                      |
| None<br>Tanizawa, 2014           | Japan         | 52 | 194  | Treatment Naive                                                      | Tofogliflozin<br>20mg, 40mg                   | No comparator                 | UTI                  |
| None<br>Tanizawa, 2014           | Japan         | 52 | 602  | Any prior<br>therapies                                               | Tofogliflozin<br>20mg, 40mg                   | No comparator                 | UTI                  |
| NCT01095666<br>Yang, 2014        |               | 24 | 444  | Prior metformin                                                      | Dapagliflozin<br>5mg, 10mg                    | Placebo                       | UTI, BF              |
| None<br>Gupta, 2017              |               | 76 | 108  | Treatment Naive                                                      | Empagliflozin<br>10mg, 25mg                   | Placebo, Sitagliptin<br>100mg | UTI                  |
| NCT02354235<br>Kadowaki, 2017    | Japan         | 24 | 138  | Prior Teneligliptin                                                  | Canagliflozin<br>100mg                        | Placebo                       | UTI, DKA, BF         |
| NCT01734785<br>Softeland, 2017   | International | 24 | 333  | Prior metformin                                                      | Empagliflozin<br>10mg, 25mg                   | Placebo                       | UTI, AKI, DKA,<br>BF |
| NCT01958671<br>Terra, 2017       | International | 26 | 461  | Treatment Naive                                                      | Ertugliflozin<br>5mg, 15mg                    | Placebo                       | UTI                  |
| NCT 01022112<br>Not Published    |               | 12 | 383  | Treatment Naive                                                      | Canagliflozin<br>50mg, 100mg, 200mg,<br>300mg | Placebo                       | BF                   |
| NCT02201004<br>Terauchi, 2017    |               | 16 | 211  | Prior insulin<br>therapy DPP4<br>allowed                             | Tofogliflozin<br>20mg, 40mg                   | Placebo                       | UTI                  |
| NCT01986855,<br>Grunberger, 2018 | International | 52 | 468  | Prior therapies<br>(NOT metformin,<br>pioglitazone)                  | Ertugliflozin<br>5mg, 15mg                    | Placebo                       | UTI, BF              |
| NCT01999218,<br>Hollander, 2018  | International | 52 | 1326 | Prior metformin                                                      | Ertugliflozin<br>5mg, 15mg                    | Glimepiride                   | AKI, UTI, KA,<br>BF  |
| Ito, 2017                        | Japan         | 24 | 66   | Treatment Naive<br>or prior therapy<br>(NOT glitazone or<br>insulin) | Ipragliflozin<br>50mg                         | Pioglitazone 15-30mg          | UTI, KA              |
| NCT02099110,<br>Pratley, 2017    | International | 52 | 1233 | Prior metformin                                                      | Ertugliflozin<br>5mg, 15mg                    | Sitagliptin 100 mg            | UTI, KA, BF          |
| NCT02033889,<br>Rosenstock, 2017 | International | 26 | 621  | Prior metformin                                                      | Ertugliflozin<br>5mg, 15mg                    | Placebo                       | UTI, KA, F           |
| Seino, 2018                      | Japan         | 16 | 233  | Prior insulin                                                        | Luseogliflozin<br>2.5mg                       | Placebo                       | UTI                  |

|                              |               |     |        |                                            |                         |         |                           |
|------------------------------|---------------|-----|--------|--------------------------------------------|-------------------------|---------|---------------------------|
| NCT02096705,<br>Yang, 2018   | Asia          | 24  | 272    | Any prior<br>antidiabetic                  | Dapagliflozin<br>10mg   | Placebo | UTI, KA                   |
| NCT02429258,<br>Henry, 2017  | Unclear       | 4   | 100    | Background<br>metformin                    | Dapagliflozin<br>10mg   | Placebo | UTI                       |
| NCT01606007,<br>Ekholm, 2017 | Unclear       | 24  | 534    | Background<br>metformin and<br>saxagliptin | Dapagliflozin<br>10mg   | Placebo | BF                        |
| Neal, 2017                   | International | 188 | 10,142 | Any background<br>therapy                  | Canagliflozin 100-300mg | Placebo | UTI, AKI, DKA,<br>BF, AMP |

## Section 4: Additional Forest Plots

Figure 1A. Risk of Urinary Tract Infection with SGLT2 Inhibitors Compared to Placebo, break down by agent

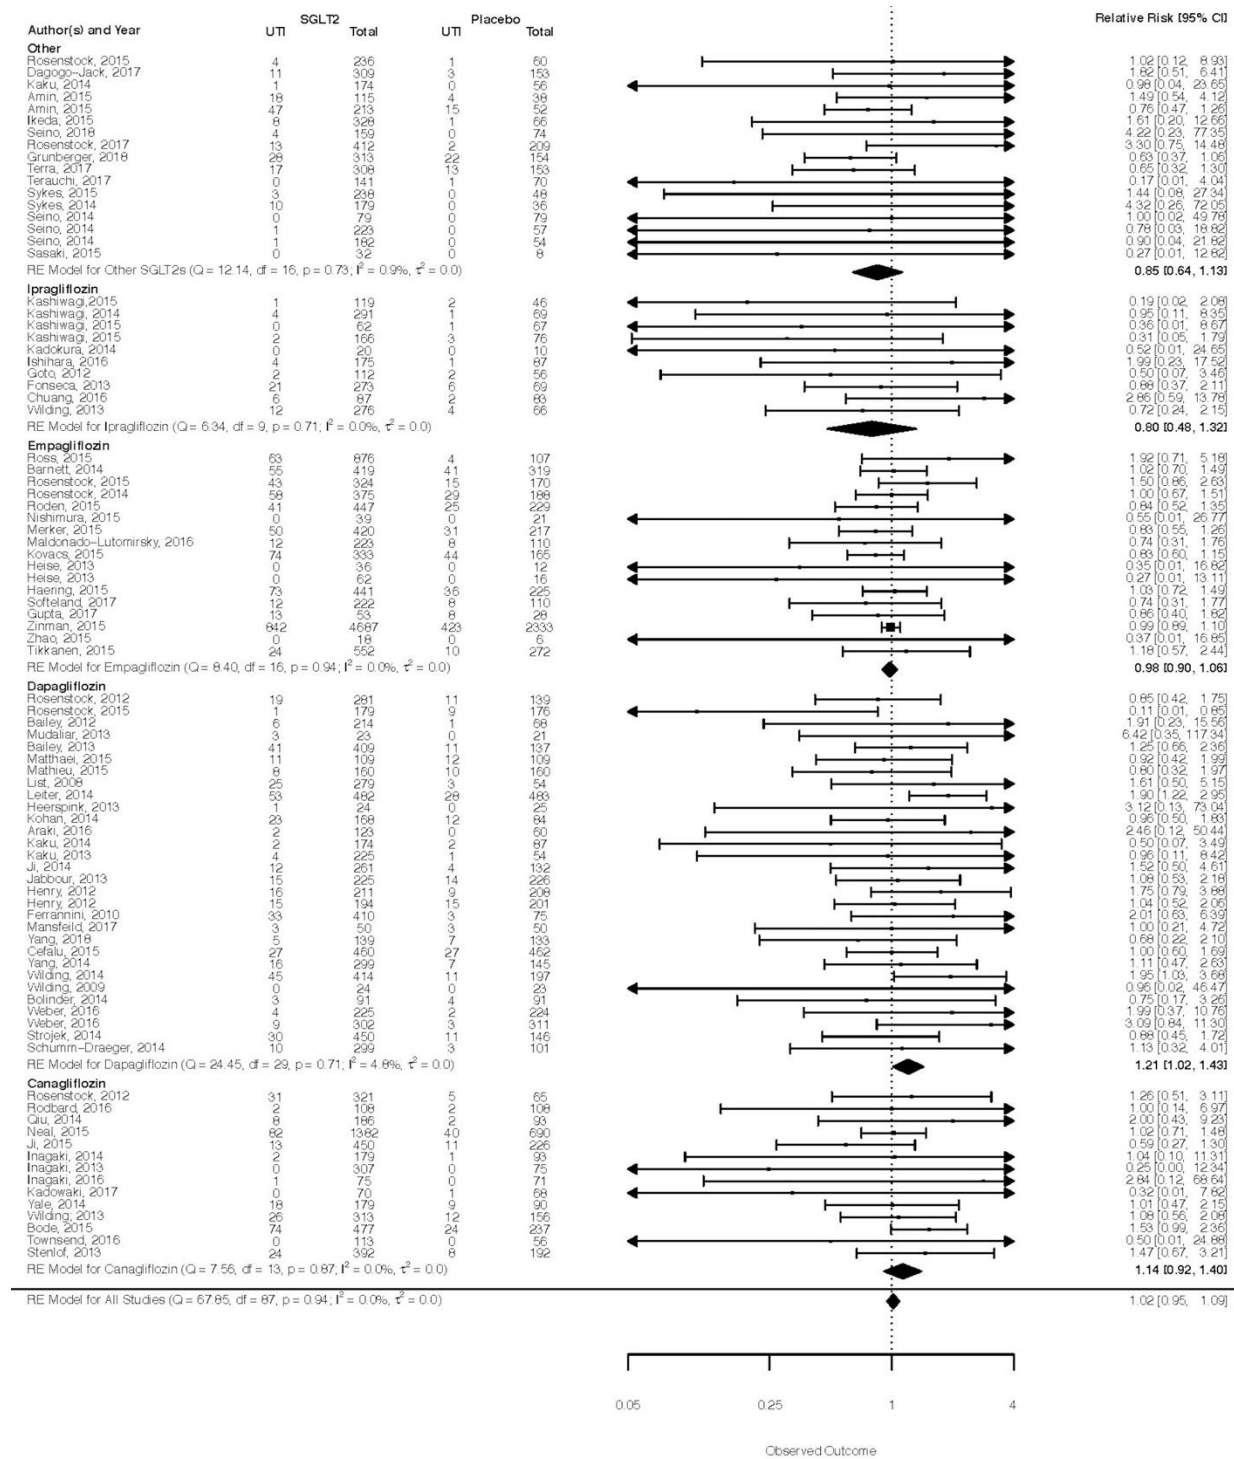

Figure 2A. Figure 1. Risk of Urinary Tract Infection with SGLT2 Inhibitors Compared to Active Comparators, Breakdown by Agent

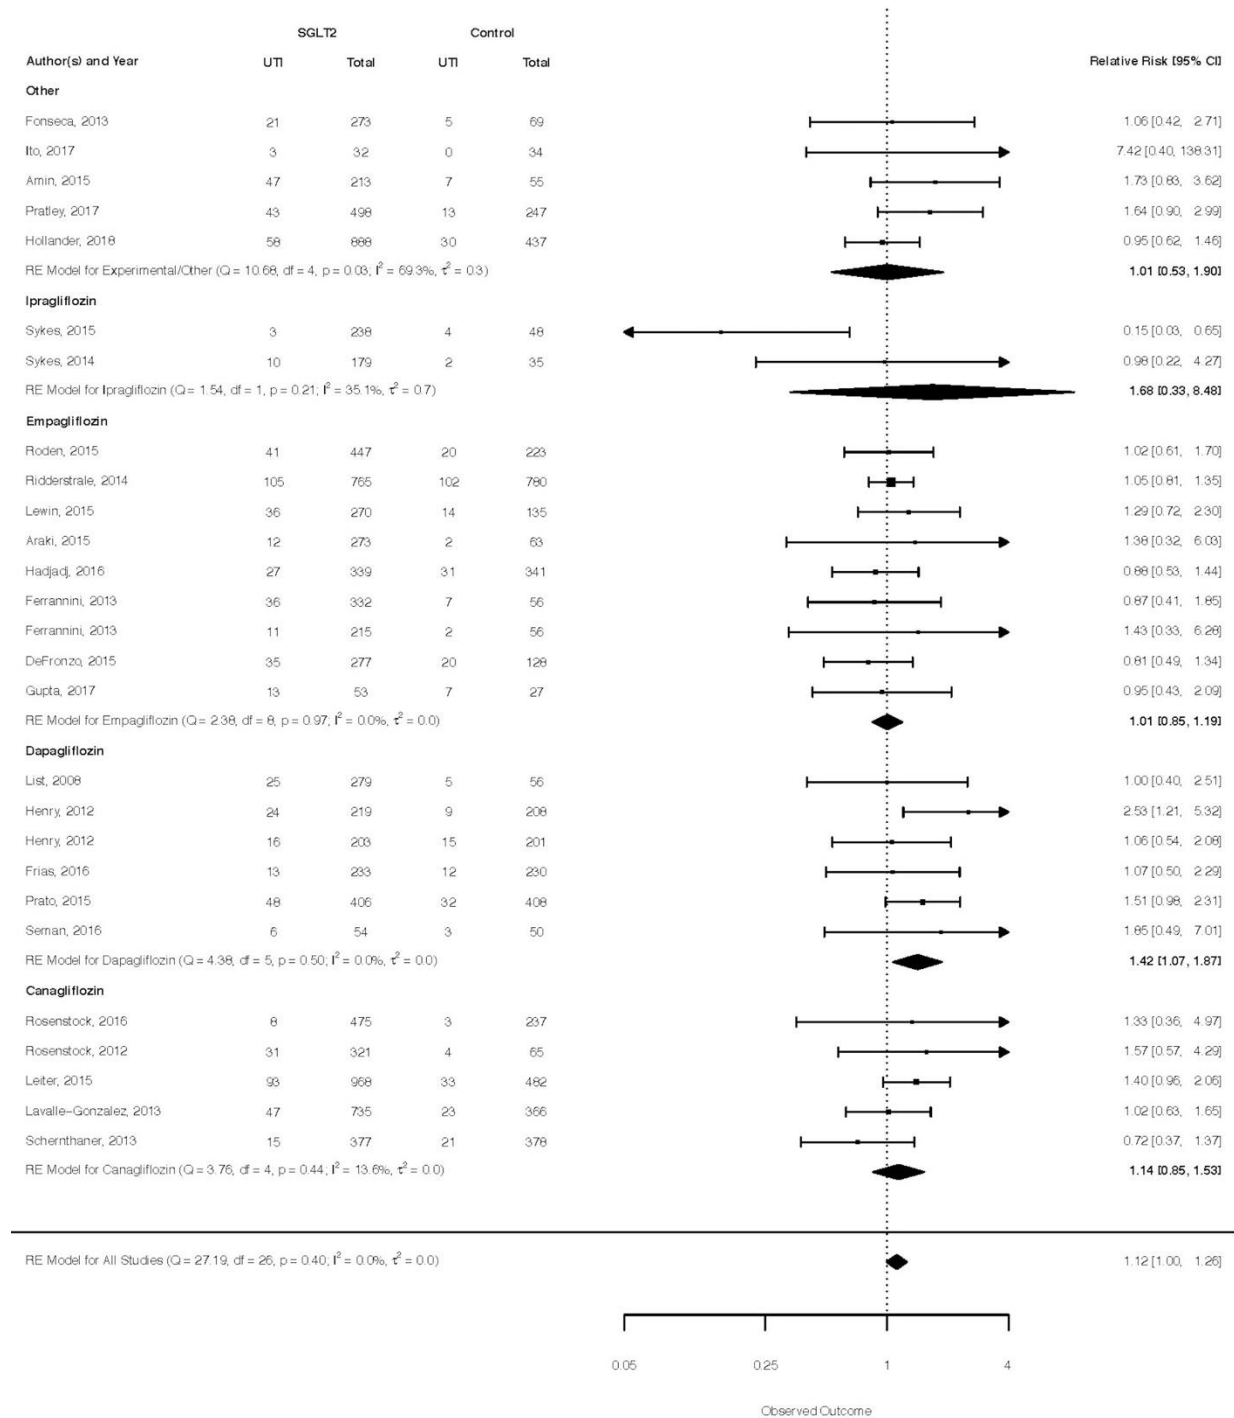



Figure 3A: Risk of Acute Kidney Injury with SGLT2 Inhibitors compared to Active Comparators

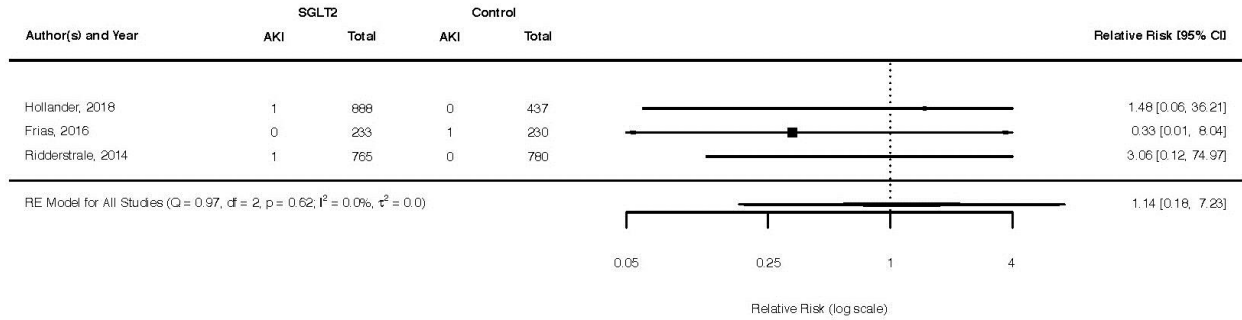

Figure 4A: Risk of Acute Kidney Injury with SGLT2 Inhibitors Compared to Placebo; excluding EMPA-REG.

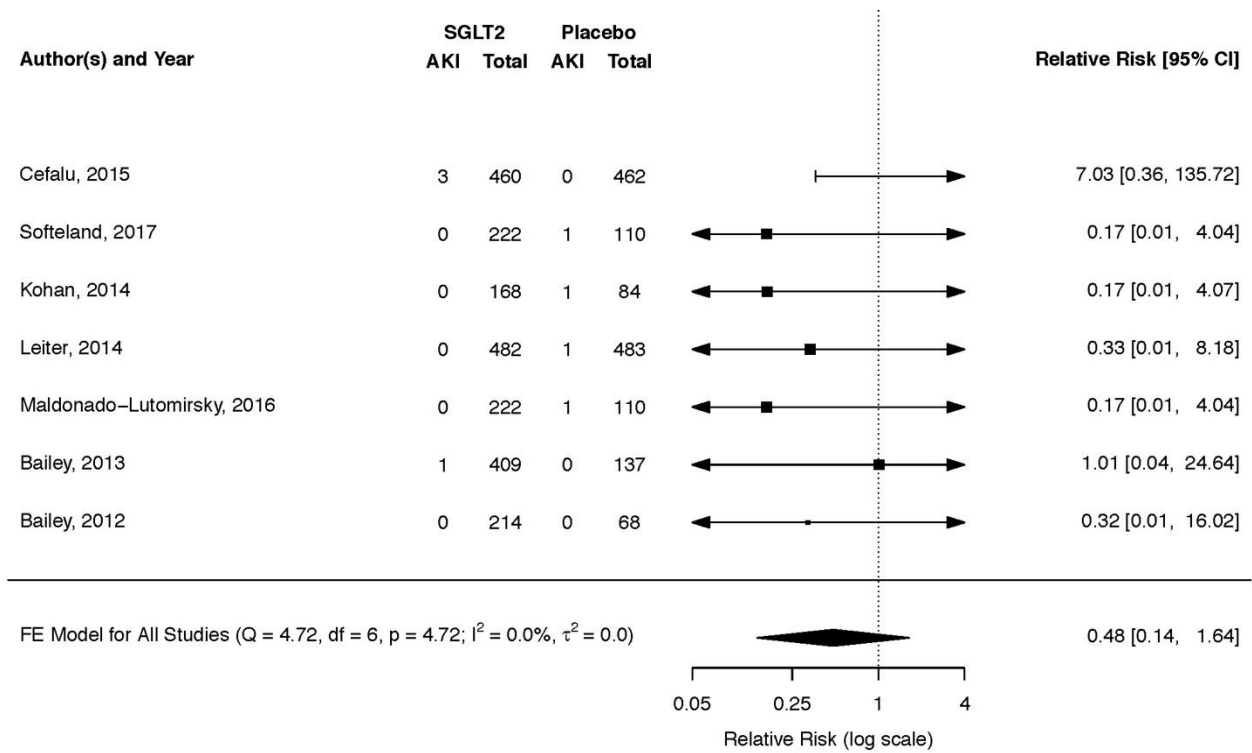

Figure 5A. Risk of Ketoacidosis among users of an SGLT2 Inhibitor compared to an Incretin

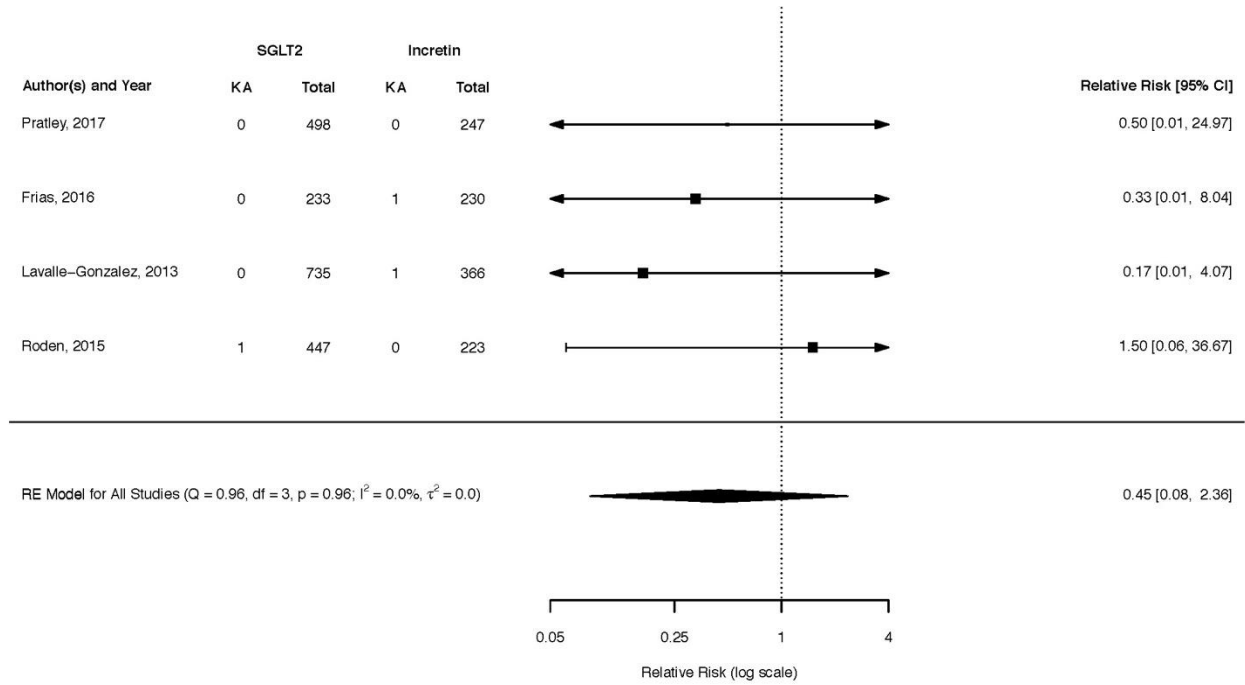

Figure 6A. Risk of Ketoacidosis among users of an SGLT2 Inhibitor Compared to Placebo in Studies with at least one Outcome

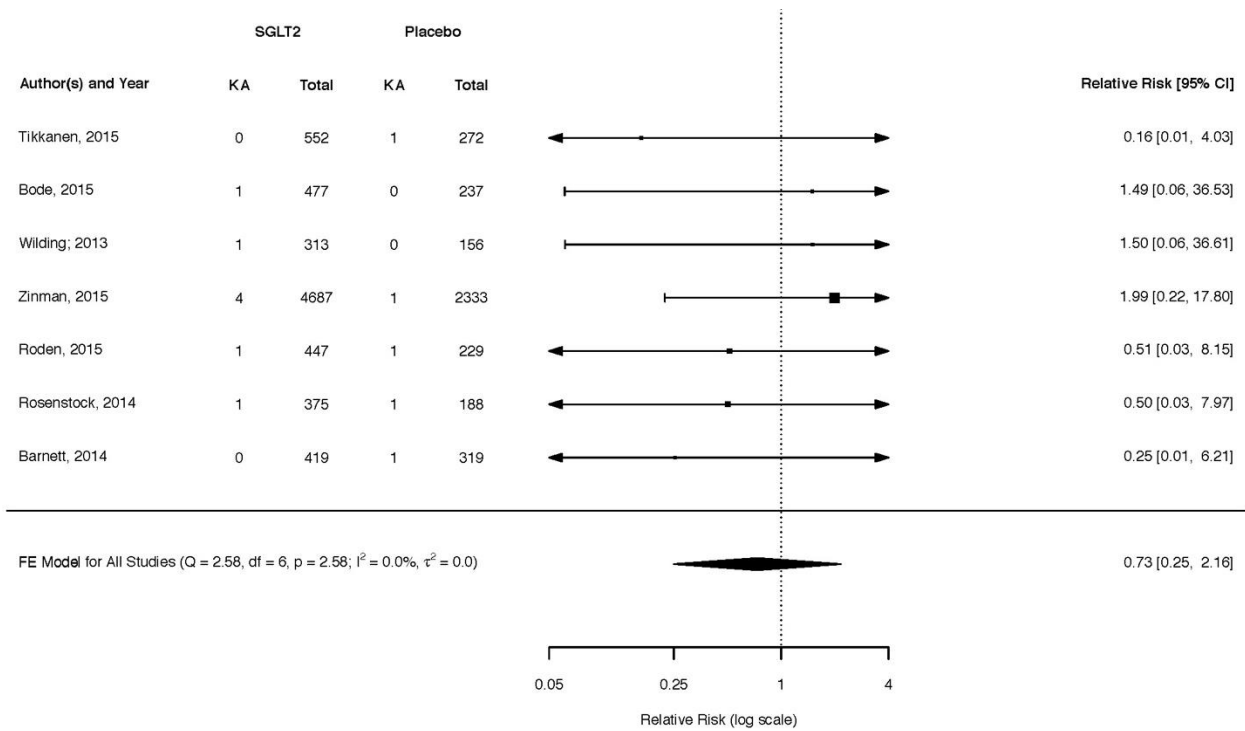

Figure 7A. Risk of Urinary Tract Infections among users of SGLT2 Inhibitors Compared to Active Controls

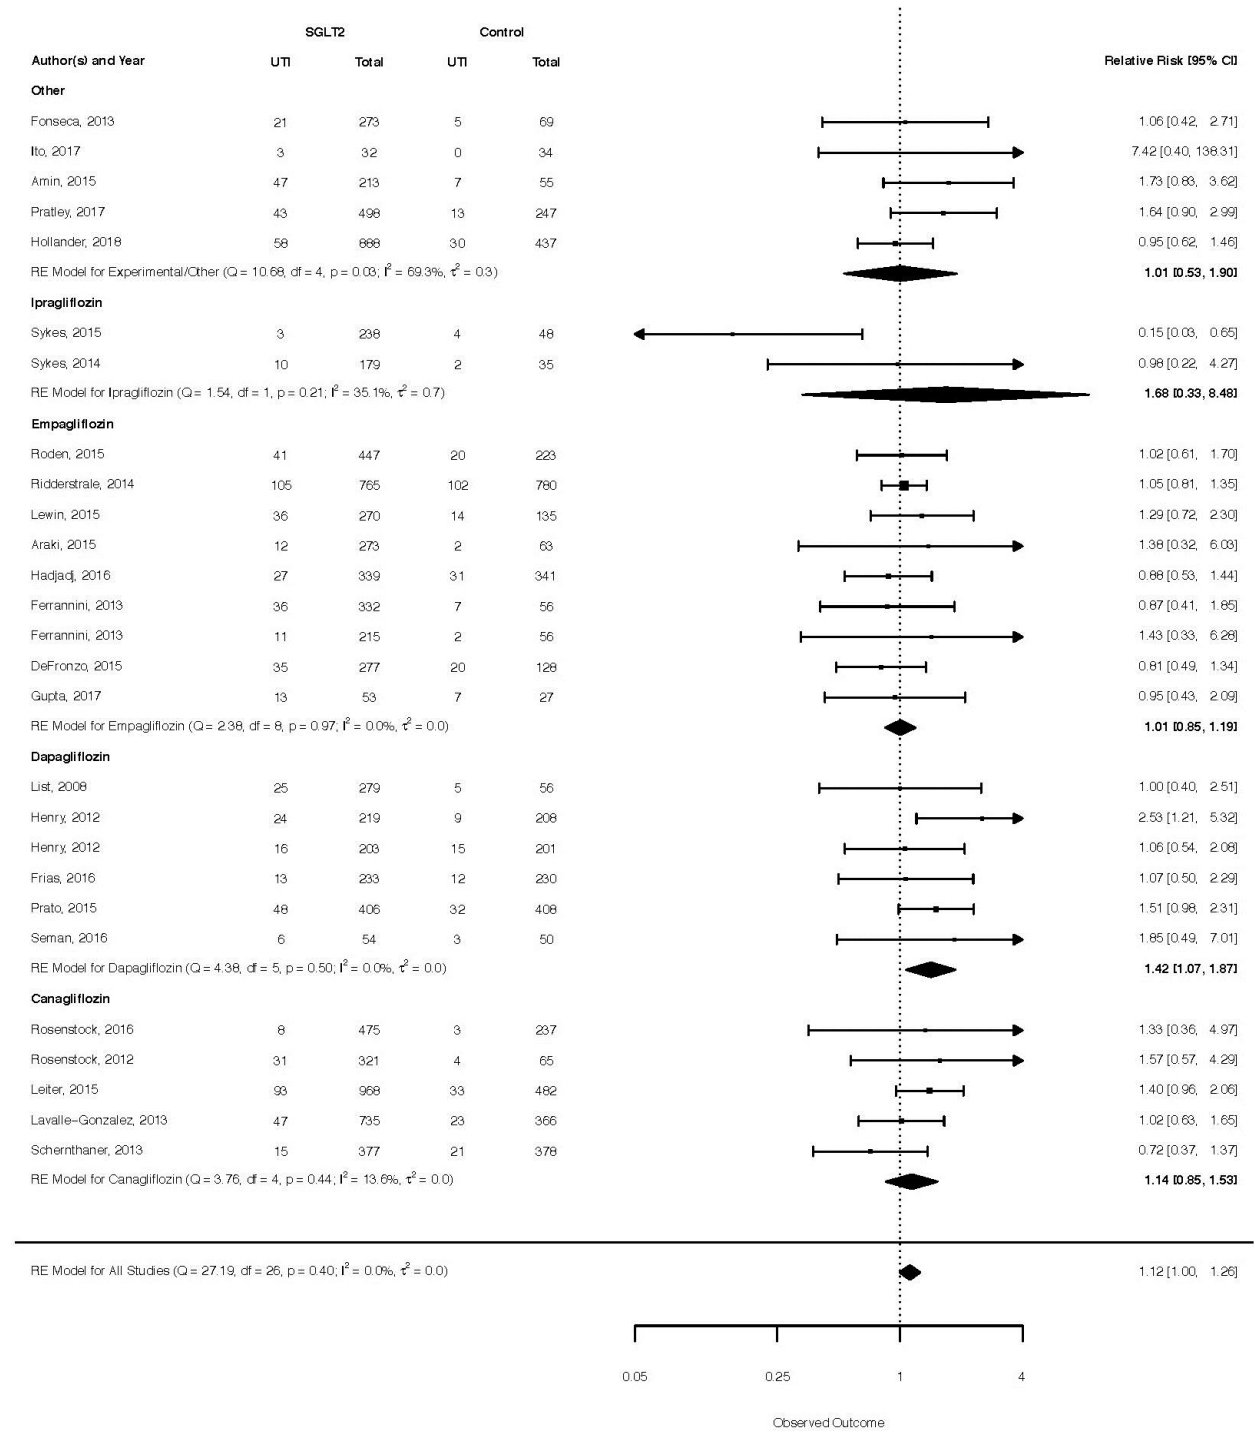

Figure 8A: Risk of Fracture with SGLT2 Inhibitors compared to Metformin

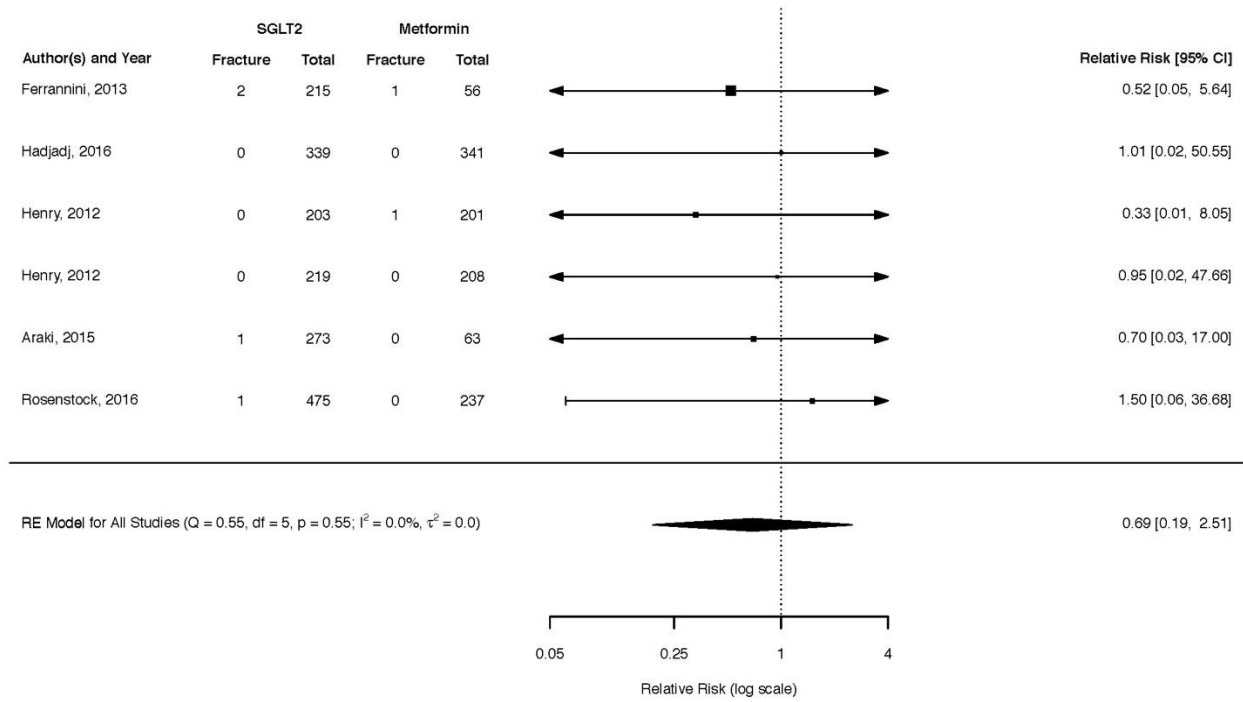

Figure 9A: Risk of Fracture with SGLT2 Inhibitors compared to Sulfonylureas

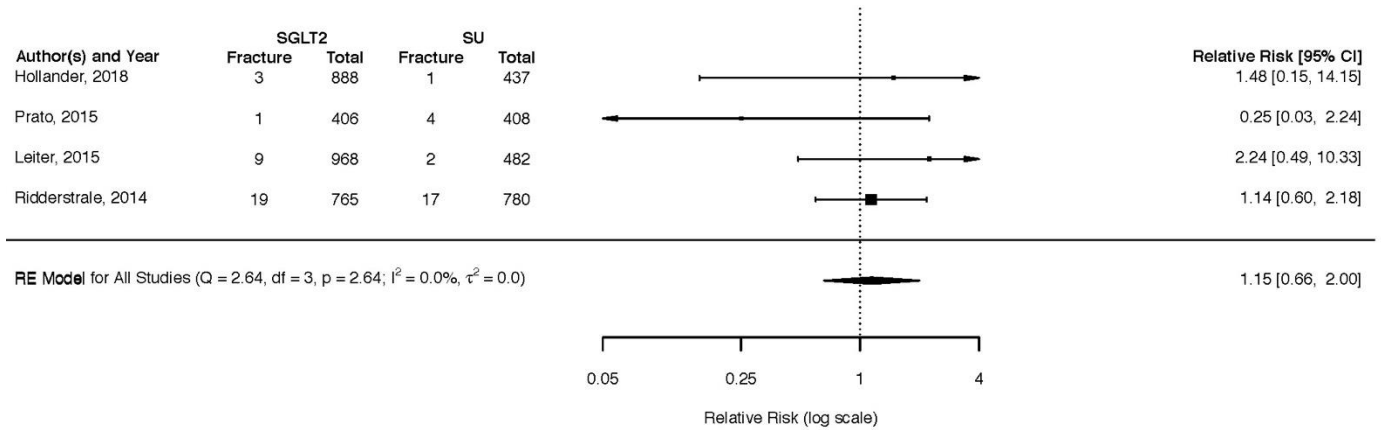

Figure 10A: Risk of Fracture with SGLT2 Inhibitors compared to Incretins

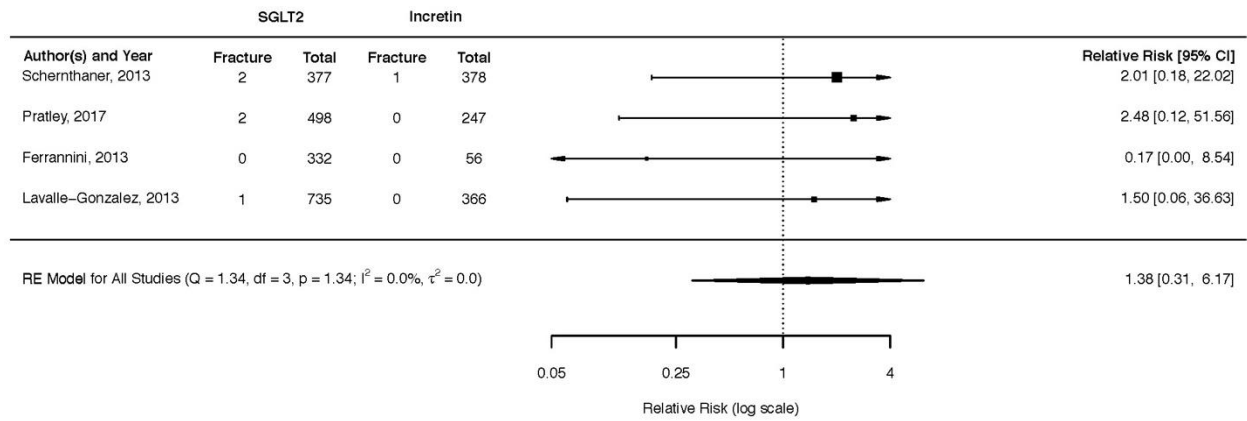

Figure 11A: Risk of Fracture with Canagliflozin compared to Placebo

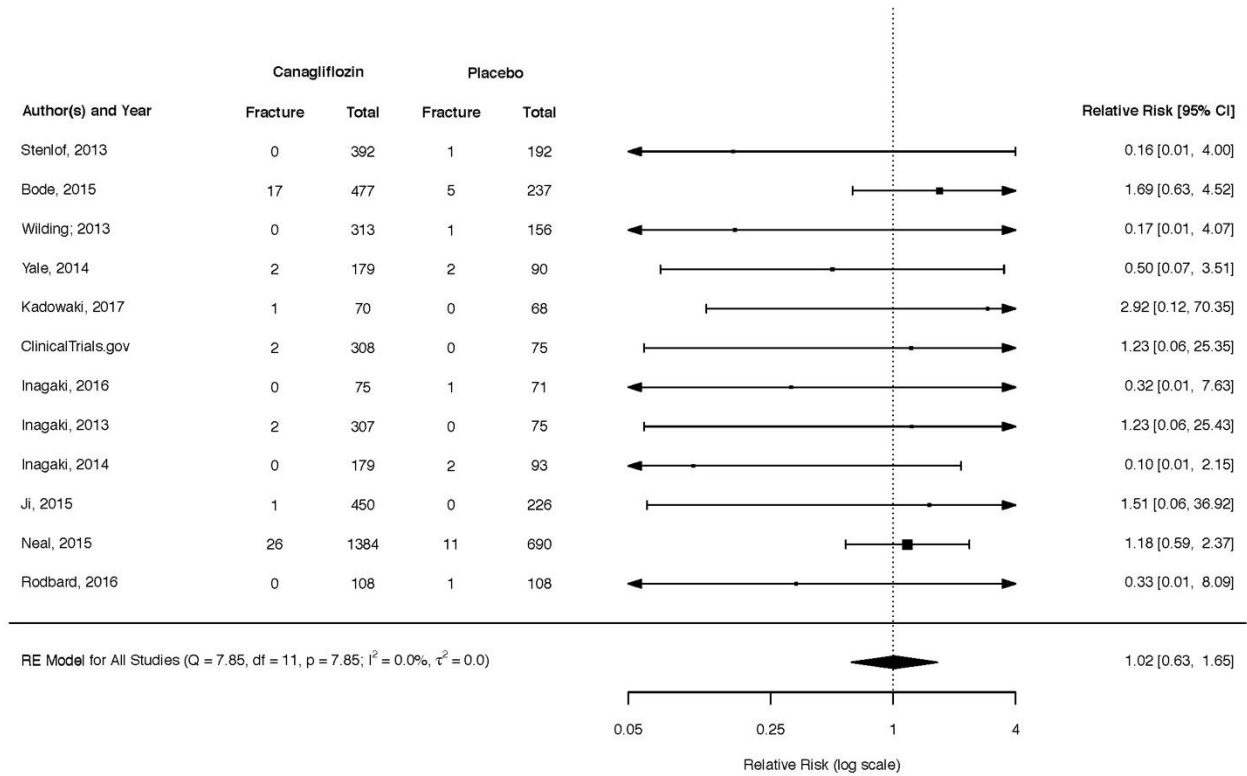

## Section 5: Forest Plots for Fixed Effects Analysis

Figure 12A. Risk of Acute Kidney Injury with SGLT2 Inhibitors compared to Placebo - Fixed Effect Model

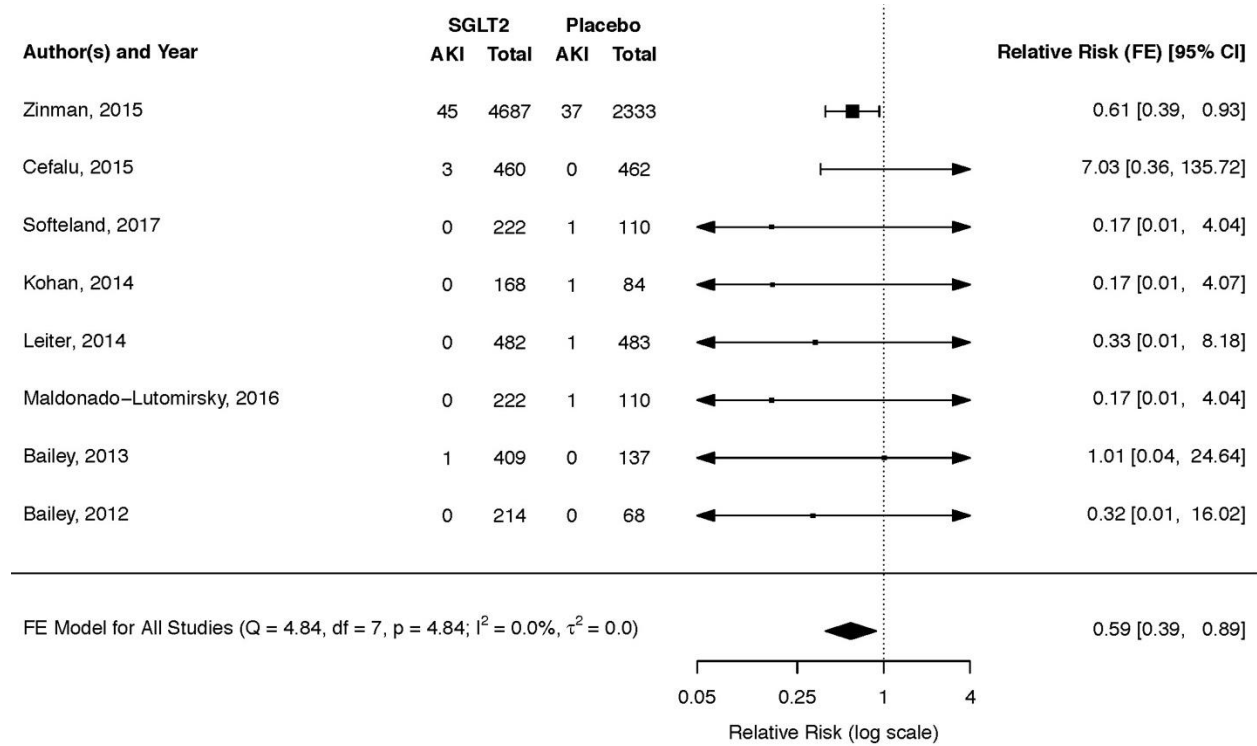

Figure 13A. Risk of Diabetic Ketoacidosis with SGLT2 Inhibitors compared to Placebo - Fixed Effect Model

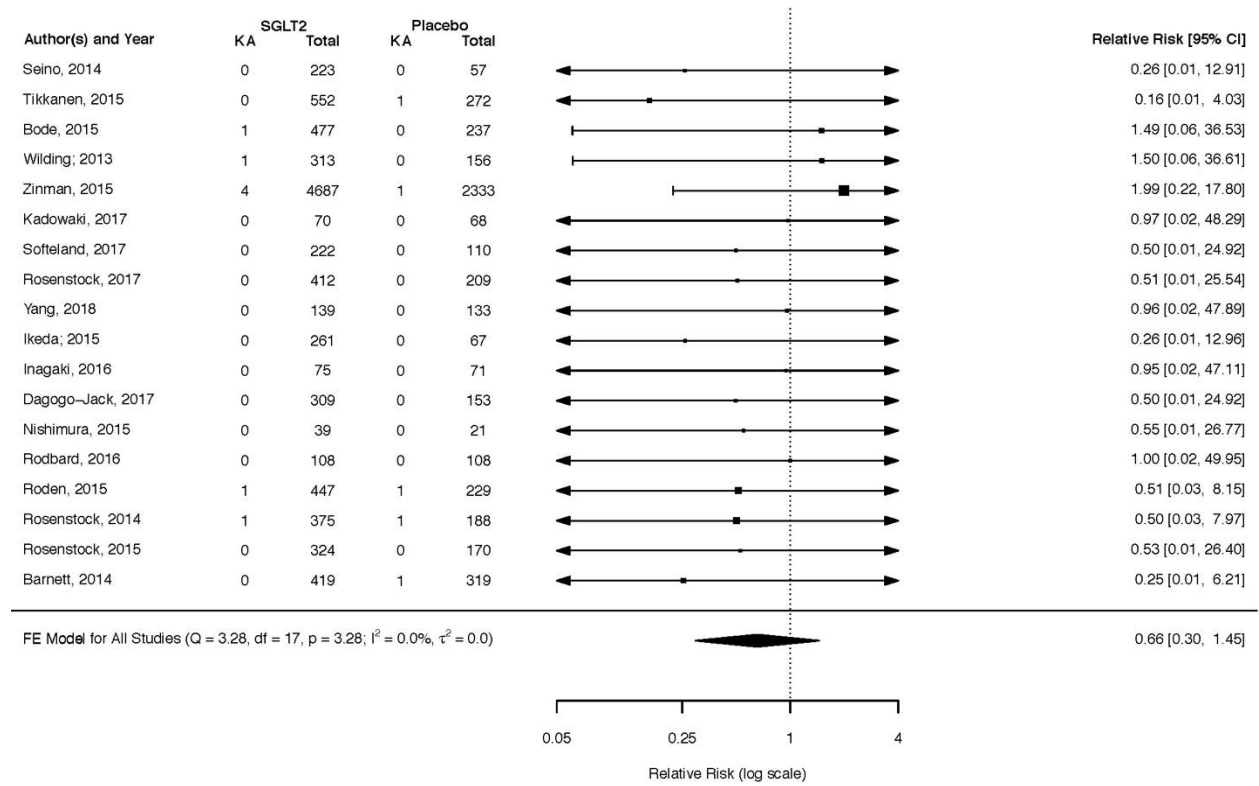

Figure 14A. Risk of Urinary Tract Infection with SGLT2 Inhibitors compared to Placebo - Fixed Effect Model

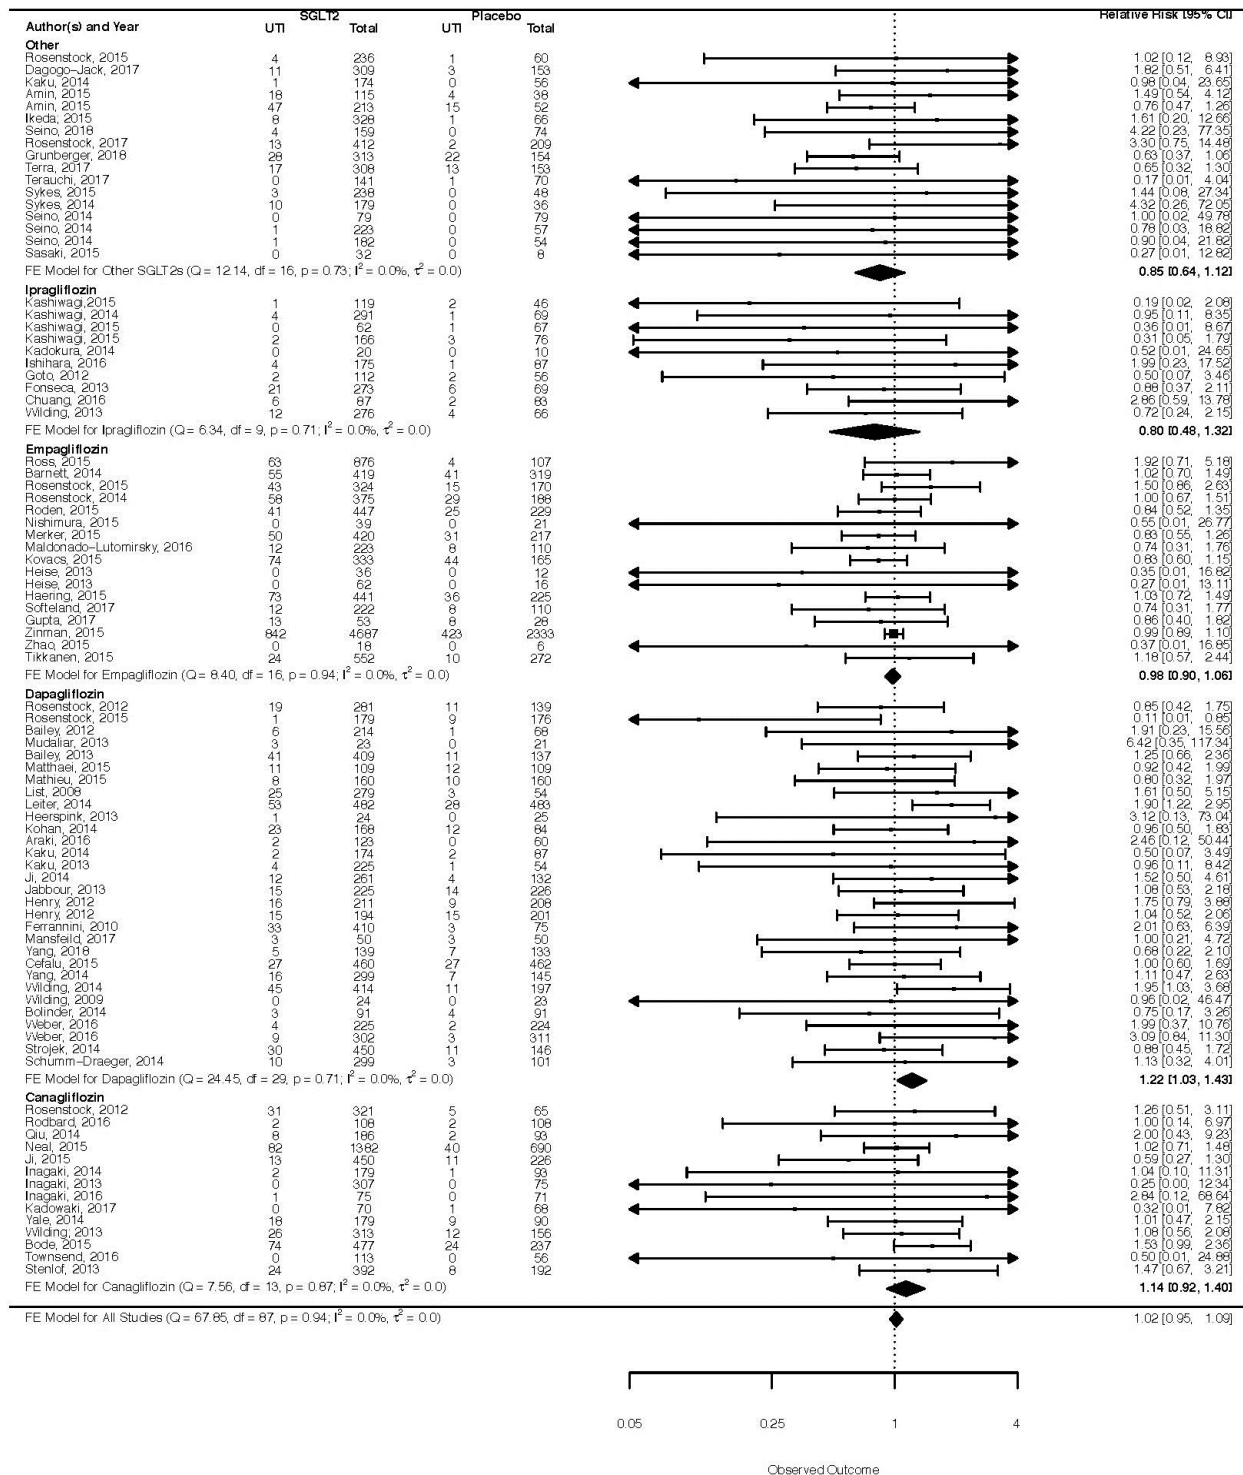



Figure 15A. Risk of Fracture with SGLT2 Inhibitors compared to Placebo - Fixed Effect Model

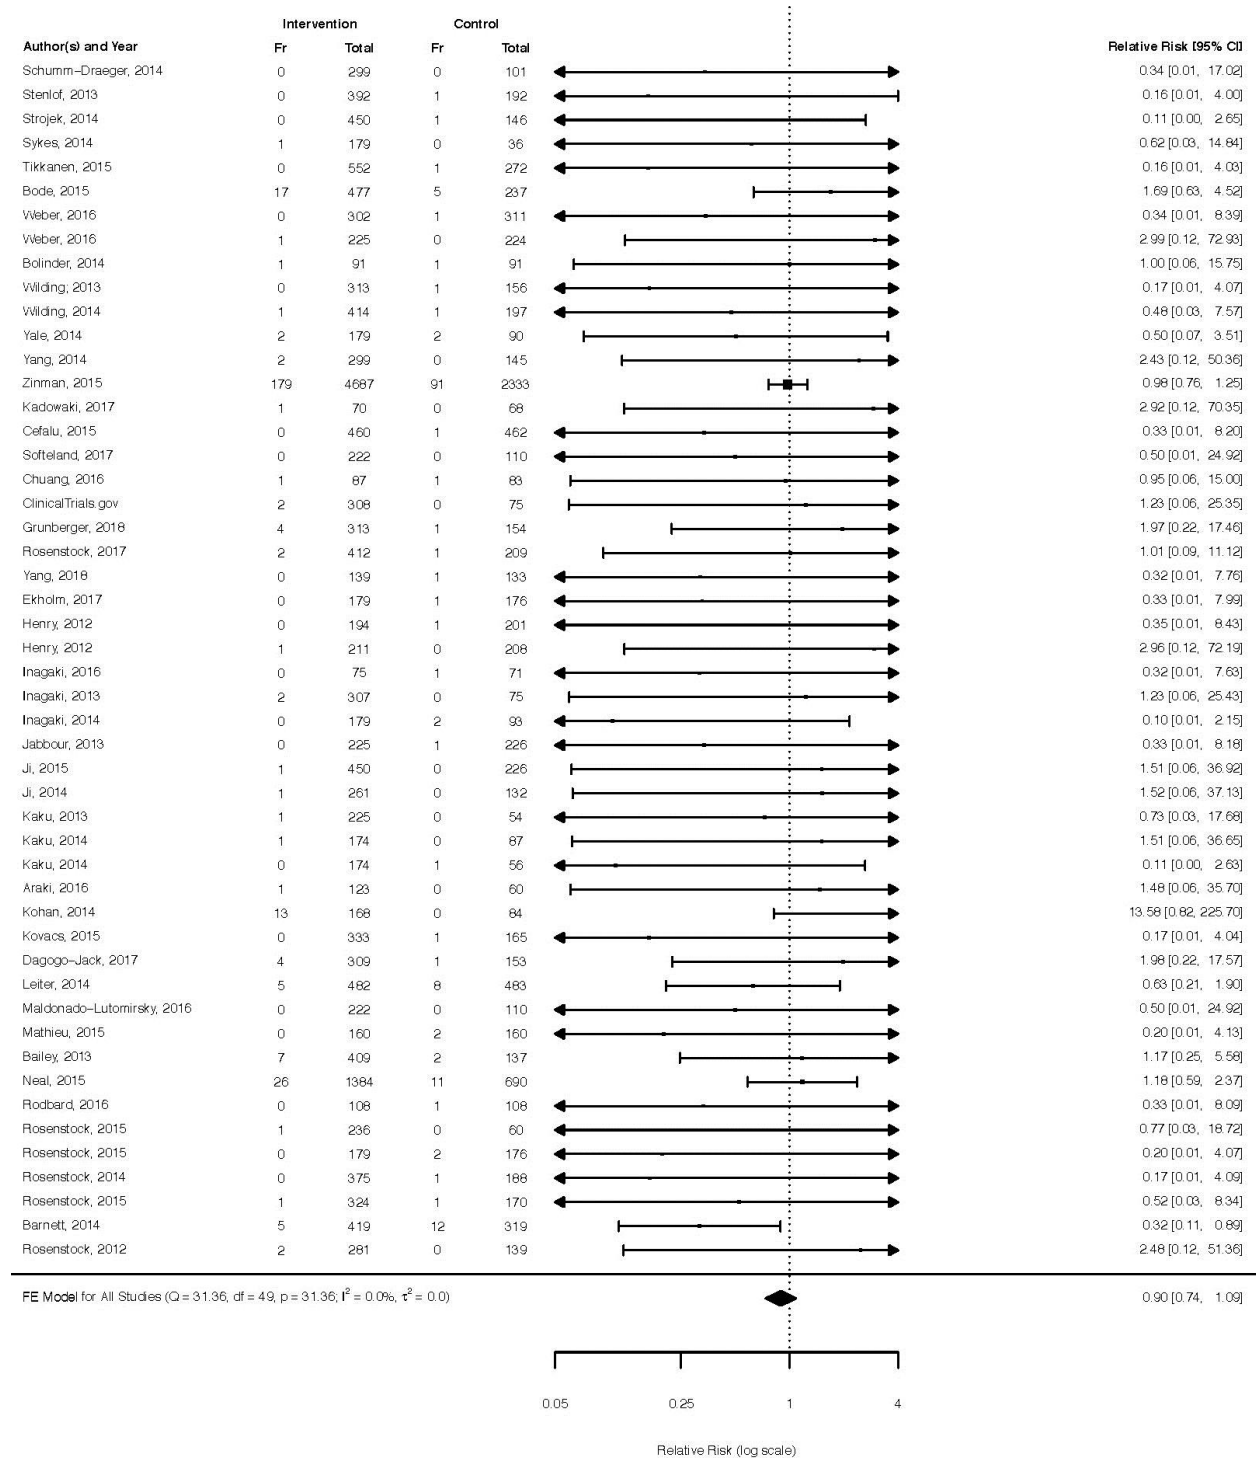

## Section 6: Risk of Bias Assessment

Table 7A. Risk of Bias Assessment for Included Studies

| Author and Year  | NCT#        | Randomization Sequence | Allocation concealment | Double Blinding | Blinded Outcome Assessment | Incomplete Outcome | Selective Reporting | Other        | Overall Assessment |
|------------------|-------------|------------------------|------------------------|-----------------|----------------------------|--------------------|---------------------|--------------|--------------------|
| Amin, 2015       | NCT01059825 | Low Risk               | Low Risk               | Low Risk        | Low Risk                   | Low Risk           | Low Risk            | Low Risk     | low                |
| Amin, 2015       | NCT01059825 | Unclear Risk           | Unclear Risk           | Low Risk        | Unclear Risk               | Low Risk           | Unclear Risk        | Unclear risk | high               |
| Araki, 2016      | NCT02157298 | Unclear Risk           | Low Risk               | Low Risk        | Low Risk                   | Low Risk           | Low Risk            | Unclear risk | low                |
| Araki            | NCT01368081 | Low Risk               | Low Risk               | Medium Risk     | Unclear Risk               | Low Risk           | High Risk           | Unclear risk | high               |
| Bailey, 2013     | NCT00528879 | Low Risk               | Low Risk               | Low Risk        | Low Risk                   | Medium Risk        | Unclear Risk        | Unclear risk | high               |
| Bailey, 2012     | None        | Low Risk               | Low Risk               | Low Risk        | Low Risk                   | Low Risk           | Low Risk            | Low Risk     | low                |
| Barnett, 2014    | NCT01164501 | Low Risk               | Low Risk               | Low Risk        | Low Risk                   | Low Risk           | High Risk           | Unclear risk | high               |
| Bode, 2015       | NCT01106651 | Low Risk               | Low Risk               | Low Risk        | Low Risk                   | Low Risk           | High Risk           | Unclear risk | high               |
| Bolinder, 2014   | NCT00855166 | Low Risk               | Low Risk               | Low Risk        | Low Risk                   | low Risk           | Low Risk            | Unclear risk | low                |
| Cefalu, 2015     | NCT01031680 | Low Risk               | Low Risk               | Medium Risk     | Low Risk                   | Low Risk           | High Risk           | Low Risk     | high               |
| Chuang, 2016     | NCT01505426 | Low Risk               | Low Risk               | Low Risk        | Low Risk                   | Low Risk           | Low Risk            | Unclear risk | low                |
| DeFronzo, 2015   | NCT01422876 | Low Risk               | Low Risk               | Low Risk        | Unclear Risk               | Low Risk           | Low Risk            | Unclear risk | low                |
| Prato, 2015      | NCT00660907 | Low Risk               | Low Risk               | Low Risk        | Low Risk                   | Low Risk           | High Risk           | Unclear risk | high               |
| Ferrannini, 2013 | NCT00881530 | High Risk              | High Risk              | High Risk       | High Risk                  | Low Risk           | High Risk           | Unclear risk | high               |
| Ferrannini, 2010 | NCT00528372 | Unclear Risk           | Unclear Risk           | Low Risk        | Unclear Risk               | Unclear Risk       | Unclear Risk        | Unclear risk | high               |
| Fonseca, 2013    | NCT01071850 | Unclear Risk           | Low Risk               | Low Risk        | Low Risk                   | Low Risk           | Low Risk            | Unclear risk | low                |
| Frias, 2016      | NCT02229396 | Low Risk               | Low Risk               | Low Risk        | Low Risk                   | Low Risk           | Low Risk            | Unclear risk | low                |
| Hadjadj, 2016    | NCT01719003 | Low Risk               | Low Risk               | Low Risk        | Low Risk                   | Low Risk           | High Risk           | Unclear risk | high               |
| Haering, 2015    | NCT01289990 | Low Risk               | Low Risk               | Low Risk        | Unclear Risk               | Low Risk           | Low Risk            | Unclear risk | low                |
| Heise, 2013      | None        | Low Risk               | Low Risk               | Unclear Risk    | Unclear Risk               | Low Risk           | Unclear Risk        | Unclear risk | high               |
| Heise, 2013      | None        | Unclear Risk           | Low Risk               | Low Risk        | Low Risk                   | Low Risk           | Low Risk            | Unclear risk | low                |
| Henry, 2012      | NCT00643851 | Low Risk               | Low Risk               | Low Risk        | Low Risk                   | Low Risk           | High Risk           | Unclear risk | high               |

|                        |              |              |          |             |              |              |              |              |      |
|------------------------|--------------|--------------|----------|-------------|--------------|--------------|--------------|--------------|------|
| Henry, 2012            | NCT00859898  | Low Risk     | Low Risk | Low Risk    | Low Risk     | Low Risk     | High Risk    | Unclear risk | high |
| Ikeda, 2015            | NCT00800176  | Unclear Risk | Low Risk | Low Risk    | Unclear Risk | Low Risk     | Low Risk     | Unclear risk | high |
| Inagaki, 2016          | NCT02220920  | Low Risk     | Low Risk | Low Risk    | low Risk     | Low Risk     | Low Risk     | Unclear risk | low  |
| Inagaki, 2015          | NCT01387737  | Unclear Risk | Low Risk | High Risk   | High Risk    | Medium Risk  | Unclear Risk | Unclear risk | high |
| Inagaki, 2013          | NCT01022112  | Low Risk     | Low Risk | Low Risk    | Low Risk     | Low Risk     | High Risk    | Unclear risk | high |
| Inagaki, 2014          | NCT01413204  | Low Risk     | Low Risk | Low Risk    | Low Risk     | Low Risk     | High Risk    | Unclear risk | high |
| Ishihara, 2016         | NCT02175784  | Unclear Risk | Low Risk | Medium Risk | Low Risk     | Low Risk     | Low Risk     | Low Risk     | high |
| Jabbour, 2013          | NCT00984867  | Unclear Risk | Low Risk | Medium Risk | Low Risk     | Low Risk     | High Risk    | Unclear risk | high |
| Ji, 2015               | NCT01381900  | Low Risk     | Low Risk | Low Risk    | Low Risk     | Low Risk     | High Risk    | Unclear risk | high |
| Ji, 2014               | NCT01095653  | Low Risk     | Low Risk | Low Risk    | Low Risk     | Low Risk     | High Risk    | Unclear risk | high |
| Kadokura, 2014         | NCT01023945  | Low Risk     | Low Risk | Low Risk    | Low Risk     | Low Risk     | Low Risk     | Unclear risk | low  |
| Kadowaki, 2015         | NCT01193218  | Low Risk     | Low Risk | Low Risk    | Medium Risk  | Low Risk     | High Risk    | Unclear risk | high |
| Kaku, 2013             | NCT00972244  | Low Risk     | Low Risk | Low Risk    | Unclear Risk | Low Risk     | High Risk    | Unclear risk | high |
| Kaku, 2014             | none         | Unclear Risk | low Risk | Low Risk    | Unclear Risk | Medium Risk  | Unclear Risk | Unclear risk | high |
| Kaku, 2014             | None         | Low Risk     | Low Risk | Low Risk    | Low Risk     | Low Risk     | Low Risk     | Unclear risk | low  |
| Kashiwagi, 2015        | NCT01242215  | Low Risk     | Low Risk | Low Risk    | Unclear Risk | Low Risk     | Low Risk     | Unclear risk | low  |
| Kashiwagi, 2015        | NCT01057628. | Low Risk     | Low Risk | Low Risk    | Low Risk     | Low Risk     | Low Risk     | Unclear risk | low  |
| Kashiwagi, 2014        | NCT00621868  | Unclear Risk | Low Risk | Low Risk    | Low Risk     | Low Risk     | Low Risk     | Unclear risk | low  |
| Kashiwagi, 2015        | NCT01316094  | Unclear Risk | Low Risk | Low Risk    | Low Risk     | Low Risk     | Low Risk     | Unclear risk | low  |
| Kohan, 2014            | NCT00663260  | Unclear Risk | Low Risk | Low Risk    | Unclear Risk | Low Risk     | Low Risk     | Unclear risk | high |
| Kovacs, 2015           | NCT01210001  | Low Risk     | Low Risk | Low Risk    | Medium Risk  | Low Risk     | High Risk    | Unclear risk | high |
| Heerspink, 2013        | NCT00976495  | Low Risk     | Low Risk | Low Risk    | Low Risk     | Low Risk     | Low Risk     | Unclear risk | low  |
| Lavalle-Gonzalez, 2013 | NCT01106677  | Low Risk     | Low Risk | Low Risk    | Low Risk     | Low Risk     | High Risk    | Unclear risk | high |
| Leiter, 2014           | NCT01042977  | Low Risk     | Low Risk | Low Risk    | Low Risk     | Unclear Risk | Low Risk     | Unclear risk | low  |
| Leiter, 2015           | NCT00968812  | Low Risk     | Low Risk | Low Risk    | Low Risk     | Low Risk     | High Risk    | Unclear risk | high |
| Lewin, 2015            | NCT01422876  | Unclear Risk | Low Risk | Low Risk    | Low Risk     | Low Risk     | Low Risk     | Low Risk     | low  |
| List, 2008             | NCT00263276  | Unclear Risk | Low Risk | Low Risk    | Low Risk     | Unclear Risk | Low Risk     | Unclear risk | high |

|                      |             |              |          |             |              |              |              |              |      |
|----------------------|-------------|--------------|----------|-------------|--------------|--------------|--------------|--------------|------|
| Mathieu, 2015        | NCT01646320 | Low Risk     | Low Risk | Low Risk    | Low Risk     | Low Risk     | Low Risk     | Unclear risk | low  |
| Matthaei, 2015       | NCT01392677 | Low Risk     | Low Risk | Low Risk    | Low Risk     | Low Risk     | Low Risk     | Unclear risk | low  |
| Mudaliar, 2013       | None        | Unclear Risk | Low Risk | Low Risk    | Low Risk     | Unclear Risk | Low Risk     | Unclear risk | high |
| Nishimura, 2015      | NCT01947855 | Unclear Risk | Low Risk | Low Risk    | Low Risk     | Low Risk     | Low Risk     | Unclear risk | low  |
| Qiu, 2014            | NCT01340664 | Low Risk     | Low Risk | Low Risk    | Low Risk     | Low Risk     | Low Risk     | Unclear risk | low  |
| Rodbard, 2016        | NCT01989754 | Low Risk     | Low Risk | Low Risk    | Low Risk     | Low Risk     | Low Risk     | Unclear risk | low  |
| Roden, 2015          | NCT01289990 | Low Risk     | Low Risk | Low Risk    | Low Risk     | Low Risk     | High Risk    | Unclear risk | high |
| Rosenstock, 2012     | NCT00642278 | Unclear Risk | Low Risk | Low Risk    | Low Risk     | Low Risk     | Low Risk     | Unclear risk | low  |
| Rosenstock, 2015     | NCT01376557 | Unclear Risk | Low Risk | Low Risk    | Low Risk     | Low Risk     | Low Risk     | Unclear risk | low  |
| Rosenstock, 2016     | NCT01809327 | Low Risk     | Low Risk | Low Risk    | Low Risk     | Low Risk     | High Risk    | Unclear risk | high |
| Rosenstock, 2015     | NCT01606007 | Low Risk     | Low Risk | Low Risk    | Low risk     | Low Risk     | Low Risk     | Unclear risk | low  |
| Rosenstock, 2014     | NCT01306214 | Low Risk     | Low Risk | Low Risk    | Low Risk     | Low Risk     | High Risk    | Unclear risk | high |
| Rosenstock, 2015     | NCT01011868 | Low Risk     | Low Risk | Low Risk    | Low Risk     | Low Risk     | High Risk    | Unclear risk | high |
| Rosenstock, 2012     | NCT00683878 | Unclear Risk | Low Risk | Low Risk    | Low Risk     | Low Risk     | Low Risk     | Unclear risk | low  |
| Ross, 2015           | None        | Unclear Risk | Low Risk | Low Risk    | Low Risk     | Low Risk     | Low Risk     | Unclear risk | low  |
| Sasaki, 2015         | None        | Low Risk     | Low Risk | Medium Risk | High Risk    | Unclear Risk | Unclear Risk | High Risk    | high |
| Schernthaner, 2013   | NCT01137812 | Low Risk     | Low Risk | Low Risk    | Low Risk     | Low Risk     | Low Risk     | Unclear risk | low  |
| Schumm-Draeger, 2014 | NCT01217892 | Low Risk     | Low Risk | Low Risk    | Low Risk     | Low Risk     | Low Risk     | Unclear risk | low  |
| Seino, 2014          | None        | Low Risk     | Low Risk | Low Risk    | Low Risk     | Low Risk     | Low Risk     | Unclear Risk | low  |
| Seino, 2014          | None        | Low Risk     | Low Risk | Low Risk    | Low Risk     | Low Risk     | Low Risk     | Unclear Risk | low  |
| Seino, 2014          | None        | Low Risk     | Low Risk | Low Risk    | Low Risk     | Low Risk     | Low Risk     | Unclear Risk | low  |
| Stenlof, 2013        | NCT01081834 | Unclear Risk | Low Risk | Low Risk    | Unclear Risk | Low Risk     | Low Risk     | Unclear Risk | high |
| Strojek, 2014        | NCT00680745 | Low Risk     | Low Risk | Low Risk    | Low Risk     | Low Risk     | High Risk    | Unclear Risk | high |
| Sykes, 2015          | NCT00500331 | Unclear Risk | Low Risk | Low Risk    | Low Risk     | Low Risk     | Low Risk     | Unclear Risk | low  |
| Tikkanen, 2015       | NCT01370005 | Medium Risk  | Low Risk | Low Risk    | Low Risk     | Low Risk     | Low Risk     | Unclear Risk | high |
| Townsend, 2016       | None        | Unclear Risk | Low Risk | Low Risk    | Low Risk     | Low Risk     | Low Risk     | Unclear Risk | low  |
| Seman, 2016          | None        | Unclear Risk | Low Risk | High Risk   | High Risk    | Unclear Risk | Unclear Risk | Unclear Risk | high |

|                            |             |              |          |           |              |             |           |              |      |
|----------------------------|-------------|--------------|----------|-----------|--------------|-------------|-----------|--------------|------|
| Weber, 2016                | NCT01137474 | Low Risk     | Low Risk | Low Risk  | Low Risk     | Medium Risk | High Risk | Unclear Risk | high |
| Weber, 2016                | NCT01195662 | Low Risk     | Low Risk | Low Risk  | Low Risk     | Low Risk    | High Risk | Unclear Risk | high |
| Wilding; 2013              | NCT01106625 | Low Risk     | Low Risk | Low Risk  | Low Risk     | Low Risk    | High Risk | Unclear Risk | high |
| Wilding, 2013              | NCT01117584 | Unclear Risk | Low Risk | Low Risk  | Low Risk     | Low Risk    | Low Risk  | Unclear Risk | low  |
| Wilding, 2009              | NCT00357370 | Unclear Risk | Low Risk | Low Risk  | Low Risk     | Low Risk    | Low Risk  | Unclear Risk | low  |
| Wilding, 2014              | NCT00673231 | Low Risk     | Low Risk | Low Risk  | Low Risk     | Low Risk    | High Risk | Unclear Risk | high |
| Yale, 2014                 | NCT01064414 | Unclear Risk | Low Risk | Low Risk  | Low Risk     | Low Risk    | Low Risk  | Unclear Risk | low  |
| Zhao, 2015                 | NCT01316341 | Medium Risk  | Low Risk | Low Risk  | Low risk     | Low Risk    | Low Risk  | Unclear Risk | high |
| Zinman, 2015               | NCT01131676 | Low Risk     | Low Risk | Low Risk  | Low Risk     | Low Risk    | Low Risk  | Low Risk     | low  |
| Goto, 2012                 | None        | Unclear Risk | Low Risk | Low Risk  | Unclear Risk | Low Risk    | Low Risk  | Unclear risk | high |
| Dagogo-Jack, 2017          | NCT02036515 | Low Risk     | Low Risk | Low Risk  | Unclear Risk | Low Risk    | Low Risk  | Unclear risk | low  |
| Maldonado-Lutomirsky, 2016 | NCT01734785 | Unclear Risk | Low Risk | Low Risk  | Unclear Risk | Low Risk    | Low Risk  | Unclear risk | high |
| Merker, 2015               | NCT01289990 | Unclear Risk | Low Risk | Low Risk  | Low Risk     | Low Risk    | Low Risk  | Unclear Risk | low  |
| Neal, 2015                 | NCT01032629 | Low Risk     | Low Risk | Low Risk  | Low Risk     | Low Risk    | Low Risk  | Unclear risk | low  |
| Ridderstrale, 2014         | NCT01167881 | Low Risk     | Low Risk | Low Risk  | Low Risk     | Low Risk    | Low Risk  | Unclear Risk | low  |
| Sykes, 2014                | NCT00495469 | Low Risk     | Low Risk | Low Risk  | Low Risk     | Low Risk    | Low Risk  | Unclear Risk | low  |
| Tanizawa, 2014             | None        | Low Risk     | Low Risk | High Risk | High Risk    | Low Risk    | Low Risk  | Unclear Risk | high |
| Yang, 2014                 | NCT01095666 | Unclear Risk | Low Risk | Low Risk  | Low Risk     | Low Risk    | Low Risk  | Unclear Risk | low  |
| Gupta, 2017                | None        | Low Risk     | Low Risk | Low Risk  | Low Risk     | Low Risk    | Low Risk  | Unclear Risk | low  |
| Kadowaki, 2017             | NCT02354235 | Low Risk     | Low Risk | Low Risk  | Low Risk     | Low Risk    | Low Risk  | Unclear Risk | low  |
| Softeland, 2017            | NCT01734785 | Low Risk     | Low Risk | Low Risk  | Low Risk     | Low Risk    | Low Risk  | Unclear Risk | low  |
| Terra, 2017                | NCT01958671 | Low Risk     | Low Risk | Low Risk  | Low Risk     | Low Risk    | Low Risk  | Unclear Risk | low  |
| ClinicalTrials.gov         |             | Low Risk     | Low Risk | Low Risk  | Low Risk     | Low Risk    | Low Risk  | Unclear Risk | low  |
| Terauchi, 2017             | NCT02201004 | Low Risk     | Low Risk | Low Risk  | Low Risk     | Low Risk    | Low Risk  | Unclear Risk | low  |
| Grunberger, 2018           | NCT01986855 | Low Risk     | Low Risk | High Risk | High Risk    | High Risk   | Low Risk  | Unclear Risk | high |
| Hollander, 2018            | NCT01999218 | Low Risk     | Low Risk | Low Risk  | Low Risk     | Low Risk    | Low Risk  | Unclear risk | Low  |
| Ito, 2017                  |             | Low Risk     | Low Risk | High Risk | High Risk    | Low Risk    | Low Risk  | Unclear risk | High |

|                  |             |              |          |          |          |           |           |              |      |
|------------------|-------------|--------------|----------|----------|----------|-----------|-----------|--------------|------|
| Pratley, 2017    | NCT02099110 | Low Risk     | Low Risk | Low Risk | Low Risk | Low Risk  | Low Risk  | Unclear risk | Low  |
| Rosenstock, 2017 | NCT02033889 | Low Risk     | Low Risk | Low Risk | Low Risk | Low Risk  | Low Risk  | Unclear risk | Low  |
| Seino, 2018      |             | Low Risk     | Low Risk | Low Risk | Low Risk | Low Risk  | Low Risk  | Unclear risk | Low  |
| Yang, 2018       | NCT02096705 | Low Risk     | Low Risk | Low Risk | Low Risk | Low Risk  | Low Risk  | Unclear risk | Low  |
| Mansfeild, 2017  | NCT02429258 | Low Risk     | Low Risk | Low Risk | Low Risk | Low Risk  | Low Risk  | Unclear Risk | Low  |
| Ekholm, 2017     | NCT01606007 | Unclear Risk | Low Risk | Low Risk | Low Risk | High Risk | High Risk | Unclear Risk | High |

Figure 16A. Risk of Bias Assessment

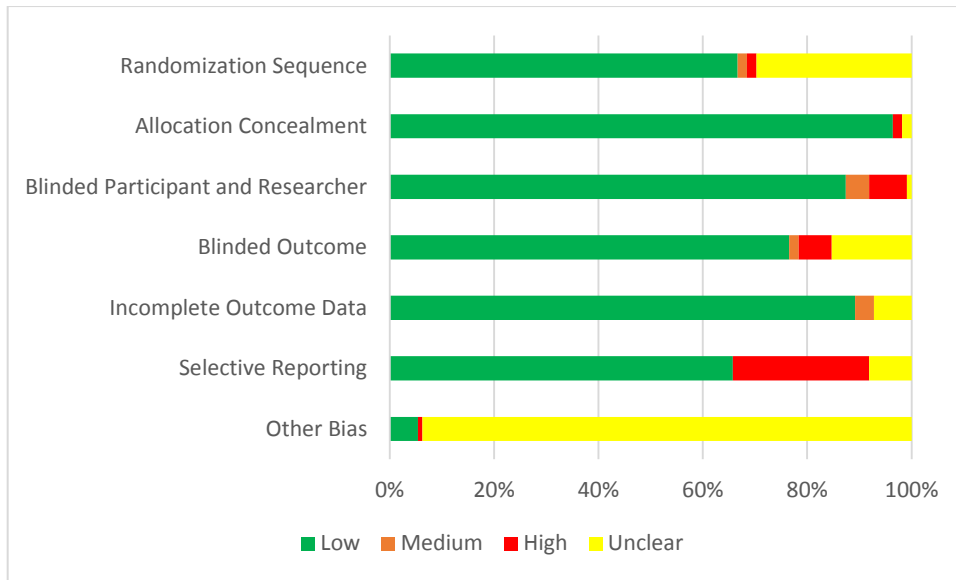

## Section 7: Assessment of Publication Bias

Figure 17A. Funnel Plot for Placebo Controlled Trials: Acute Kidney Injury

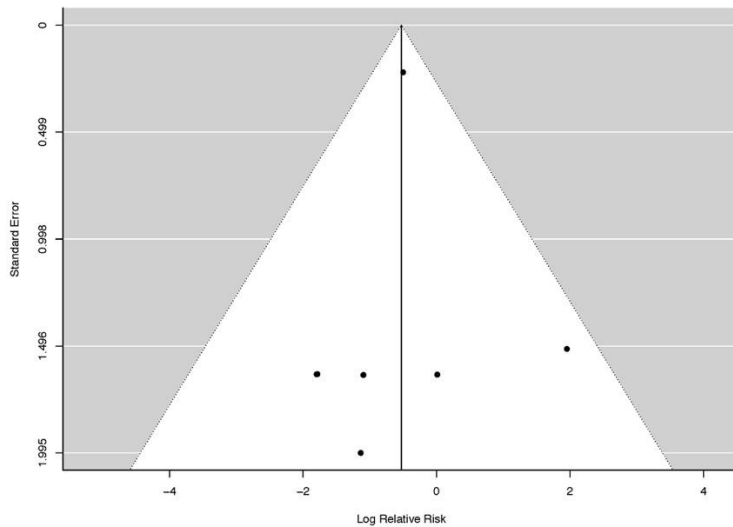

Figure 18A. Funnel Plot for Placebo Controlled Trials: Urinary Tract Infection

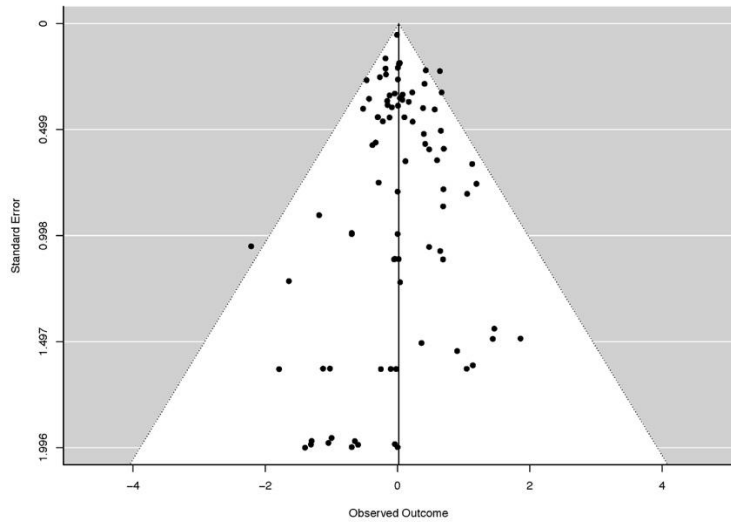

Figure 19A. Funnel Plot for Metformin Controlled Trials: Urinary Tract Infection

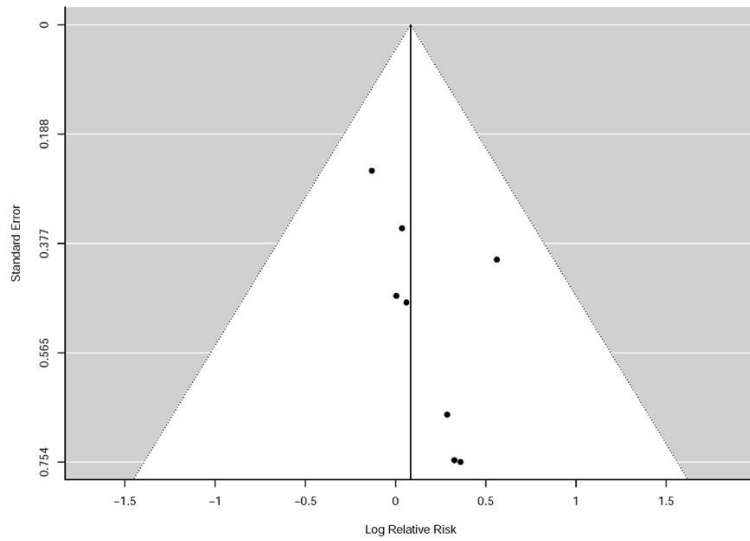



Figure 20A. Funnel Plot for Sulfonylurea Controlled Trials: Urinary Tract Infection

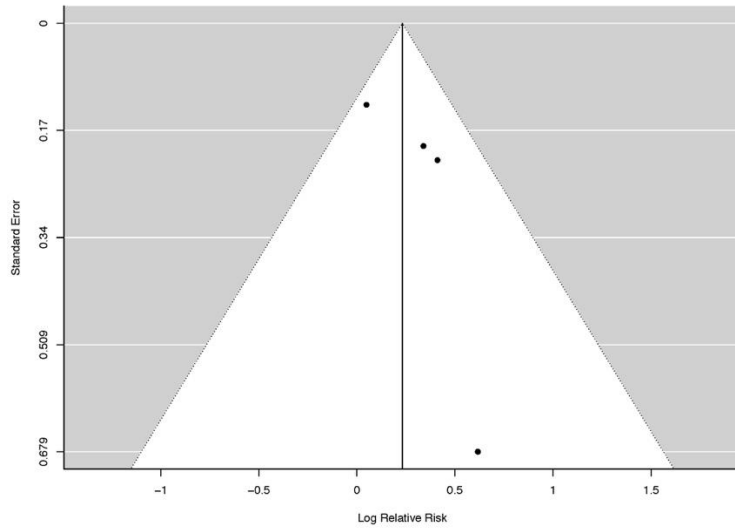

Figure 21A. Funnel Plot for Incretin Controlled Trials: Urinary Tract Infection

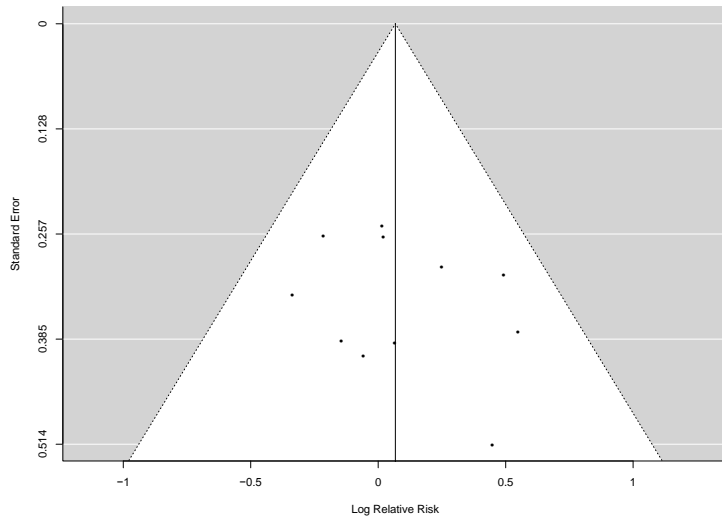

Figure 22A. Funnel Plot for Placebo Controlled Trials: Fracture

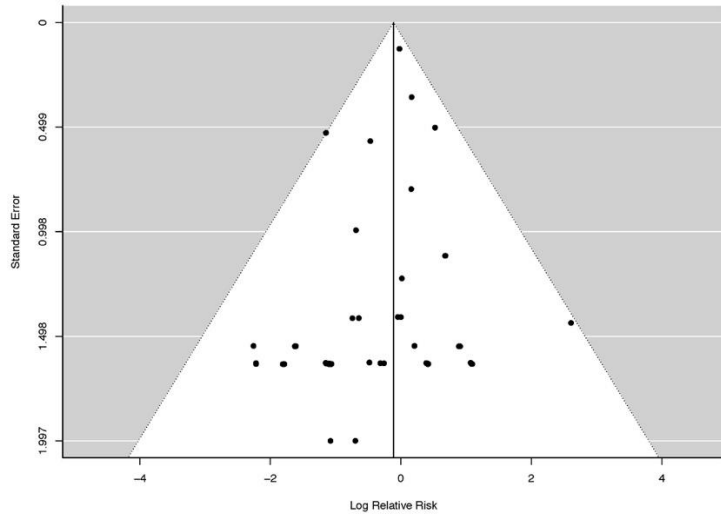

Supplement: inline-supplementary-material-1 [file inline-supplementary-material-1.pdf]
